# Supplementary material for: Epigenetic Reprogramming Sensitizes CML Stem Cells to Combined EZH2 and Tyrosine Kinase Inhibition
Source: Oxford University Press journal article supplement (doi:10.1158/2159-8290.cd-16-0263), 2016-09-14
Supplement: 21598290cd160263-sup-163019_2_supp_3598167_wwvwct.xlsx [file 21598290cd160263-sup-163019_2_supp_3598167_wwvwct.xlsx]

## Sheet: AFFYMETRIX NORMAL VERSUS CML
GENE SYMBOL	AFFYMETRIX PROBE SET ID	HSC → HPC (log2)	HSC → LSC (log2) "early"	LSC → LPC (log2) "late"	HSC → LPC (log2) "gradual"
LOC643837	7896759	0.135068	0.269968	0.410432	0.680401			significantly up-regulated
SAMD11	7896761	0.106565	-0.0214229	0.0141575	-0.00726542
KLHL17	7896779	0.108001	0.0244579	0.0762247	0.100683			significantly down-regulated
PLEKHN1	7896798	-0.144406	-0.0513332	-0.119971	-0.171304
ISG15	7896817	0.29702	0.333043	0.354203	0.687246
AGRN	7896822	0.202347	0.155498	0.0696278	0.225125
TTLL10	7896865	-0.00264981	-0.103986	0.0042102	-0.0997761
B3GALT6	7896878	0.217466	0.123536	0.283653	0.407189
SCNN1D	7896882	-0.217759	-0.217733	-0.0894023	-0.307136
PUSL1	7896908	0.245482	0.33066	0.271541	0.602201
TAS1R3	7896921	-0.0890289	-0.1136	0.0709928	-0.042607
VWA1	7896929	-0.0617069	-0.0765807	-0.0463348	-0.122916
ATAD3C	7896937	0.262227	0.289675	0.260582	0.550256
ATAD3A	7896952	0.294154	0.430189	0.275783	0.705972
ATAD3B	7896961	0.401311	0.514367	0.415014	0.929381
MIB2	7896985	0.02968	-0.0856387	0.0111866	-0.0744521
MMP23B	7897006	-0.0354831	-0.0484828	0.101252	0.052769
CALML6	7897026	0.156942	0.0206672	0.0336481	0.0543153
GABRD	7897034	0.0613901	0.0117734	0.0331369	0.0449103
PRKCZ	7897044	-0.272988	-0.331198	-0.0428329	-0.374031
LOC100128003	7897066	0.119444	0.0914323	-0.0276988	0.0637335
SKI	7897068	0.111616	0.135659	0.0924078	0.228067
RER1	7897078	0.125836	0.0893652	0.229261	0.318626
PLCH2	7897089	-0.148107	-0.0987598	-0.0940468	-0.192807
C1orf93	7897119	0.107347	0.37297	0.0379189	0.410889
ACTRT2	7897128	-0.0566473	0.0820638	-0.278267	-0.196203
PRDM16	7897132	-0.921071	-0.923836	-0.250815	-1.17465
ARHGEF16	7897154	0.00305358	0.0409797	0.0181685	0.0591481
TPRG1L	7897172	0.000865917	-0.253123	0.477148	0.224025
TP73	7897179	-0.0539844	-0.0294746	0.133863	0.104389
CCDC27	7897196	-0.0668413	-0.207481	0.0675117	-0.139969
DFFB	7897210	0.14979	0.278598	0.0796758	0.358274
AJAP1	7897227	-0.0267908	0.0599649	-0.119002	-0.0590374
KCNAB2	7897236	0.200064	-0.780978	-0.144688	-0.925666
C1orf211	7897277	0.107629	-0.00828293	-0.0265972	-0.0348802
HES3	7897280	0.185833	0.103829	0.159365	0.263194
LOC100130071	7897286	-0.0257071	-0.0829935	-0.0555429	-0.138536
ESPN	7897288	0.0851819	-0.0146963	0.0726336	0.0579373
TAS1R1	7897295	-0.111104	-0.114776	-0.0661695	-0.180945
ZBTB48	7897305	-0.0534015	-0.0200425	-0.0838284	-0.103871
PHF13	7897322	0.168511	0.12025	0.0932908	0.213541
THAP3	7897329	0.0825505	0.00561885	0.0451412	0.05076
CAMTA1	7897339	0.146646	0.307916	0.0718247	0.379741
VAMP3	7897370	-0.0542888	0.0938148	-0.0289964	0.0648184
PER3	7897378	-0.478651	0.235006	0.242225	0.477231
PARK7	7897404	0.432459	0.498762	0.127375	0.626137
SLC45A1	7897416	0.131952	-0.00889214	0.0953127	0.0864206
CA6	7897426	0.0551643	0.00514367	0.0507081	0.0558518
H6PD	7897441	0.0436636	-0.449468	0.223959	-0.225508
SPSB1	7897449	-0.421208	-0.15032	-0.367049	-0.517369
TMEM201	7897469	0.266715	0.162713	0.33743	0.500142
PIK3CD	7897482	-0.07926	-0.387048	-0.138904	-0.525952
NMNAT1	7897509	-0.00995095	0.0200344	0.169978	0.190012
RBP7	7897522	0.0197168	0.00746466	0.0638381	0.0713027
UBE4B	7897527	0.0131904	-0.100714	0.158569	0.0578547
KIF1B	7897561	-0.0881968	-0.2199	-0.000504794	-0.220405
PGD	7897620	0.582737	0.261631	0.257423	0.519053
APITD1	7897632	0.104658	0.101757	0.30575	0.407507
PEX14	7897648	0.0563408	0.0398033	0.143004	0.182807
TARDBP	7897663	-0.258506	-0.150547	0.121675	-0.0288716
ANGPTL7	7897675	-0.00106719	0.0533438	-0.126273	-0.072929
UBIAD1	7897685	0.231802	0.201896	0.228712	0.430608
PTCHD2	7897691	-0.16433	-0.0589862	-0.148956	-0.207942
FBXO44	7897714	-0.219779	-0.263439	-0.237044	-0.500482
FBXO6	7897728	0.029224	0.164147	-0.0837491	0.0803975
C1orf187	7897737	-0.173117	-0.0697124	-0.0227309	-0.0924433
AGTRAP	7897745	0.392074	0.210101	0.118536	0.328637
CLCN6	7897774	-0.203699	-0.0320883	-0.109788	-0.141876
RNU5E	7897801	0.695165	2.13971	-0.412588	1.72712
PLOD1	7897803	0.617374	0.3855	0.481655	0.867155
MFN2	7897824	0.261044	0.666192	0.167247	0.833439
MIIP	7897849	0.439257	0.816601	0.468831	1.28543
TNFRSF8	7897860	0.121735	0.603429	-0.0804496	0.52298
TNFRSF1B	7897877	-0.0401138	-0.377408	-0.342325	-0.719734
VPS13D	7897890	-0.432371	-0.24161	-0.225011	-0.46662
AADACL4	7897955	-0.0279601	-0.157617	-0.0631198	-0.220737
AADACL3	7897960	-0.00921093	-0.198232	0.191777	-0.00645544
C1orf158	7897966	-0.12964	-0.00913162	-0.103978	-0.113109
PRAMEF12	7897974	-0.201278	-0.0734235	-0.289487	-0.36291
PRAMEF1	7897978	-0.116414	-0.0889792	-0.0204318	-0.109411
PRAMEF2	7897987	-0.22203	-0.127765	-0.10062	-0.228385
PRAMEF22	7898002	-0.0195797	-0.12281	-4.20331e-06	-0.122814
PRAMEF16	7898026	-0.0959736	-0.0535492	-0.208954	-0.262503
PRAMEF17	7898048	-0.0793925	-0.0883435	-0.129856	-0.2182
PDPN	7898057	0.0221408	0.143002	-0.212674	-0.069672
PRDM2	7898070	-0.316552	-0.539695	-0.0813497	-0.621045
TMEM51	7898115	0.094973	0.334953	-0.229302	0.105651
FHAD1	7898124	0.00280744	0.0064745	-0.0394377	-0.0329632
EFHD2	7898161	0.221839	0.238672	0.279247	0.517919
CTRC	7898167	-0.136669	0.048171	-0.0622552	-0.0140841
CELA2A	7898176	0.0187696	0.851623	1.39873	2.25035
CELA2B	7898184	0.320044	1.4342	1.49518	2.92939
DNAJC16	7898192	-0.0879116	0.0371835	0.0583609	0.0955444
DDI2	7898211	0.364688	0.189749	0.486492	0.676241
PLEKHM2	7898227	0.276026	0.47162	0.0923853	0.564005
SLC25A34	7898249	-0.0264382	0.141835	-0.0445895	0.0972451
TMEM82	7898256	-0.103759	-0.069192	-0.118432	-0.187624
FBLIM1	7898263	-0.123575	-0.0562238	-0.0548812	-0.111105
SPEN	7898278	-0.194337	-0.0917488	-0.0801462	-0.171895
C1orf64	7898296	0.00418583	-0.0898171	0.108881	0.0190636
CLCNKA	7898300	0.0627501	0.0429824	-0.069701	-0.0267187
CLCNKB	7898314	0.015665	0.0696719	-0.165666	-0.0959937
C1orf144	7898328	0.148788	0.211339	0.257268	0.468608
NECAP2	7898337	-0.0644814	0.325215	0.0843426	0.409558
CROCC	7898377	-0.0138563	-0.198764	-0.0196441	-0.218408
PADI1	7898413	-0.193426	-0.115688	-0.111031	-0.22672
PADI3	7898431	0.0990396	-0.187025	-0.318399	-0.505424
PADI4	7898448	0.152828	0.0270917	-0.522326	-0.495234
PADI6	7898466	-0.0471272	-0.0112275	-0.183232	-0.19446
ARHGEF10L	7898483	0.000703319	-0.0821338	-0.0556412	-0.137775
ACTL8	7898516	-0.155405	-0.167164	-0.164867	-0.332031
IGSF21	7898521	-0.114607	0.0178581	-0.0833058	-0.0654477
KLHDC7A	7898533	-0.161518	-0.0389333	-0.106196	-0.14513
PAX7	7898537	0.0282495	0.024361	0.0899756	0.114337
MRTO4	7898549	0.862812	0.949868	0.548352	1.49822
PQLC2	7898556	-0.243103	-0.308697	-0.316265	-0.624962
LOC100130193	7898568	-0.229317	-0.112218	-0.107764	-0.219982
C1orf151	7898574	0.328103	0.0213232	0.238014	0.259337
RPS14P3	7898582	0.0694032	-0.057287	-0.0481908	-0.105478
NBL1	7898585	-0.170226	-0.152465	-0.158709	-0.311174
HTR6	7898594	-0.170463	-0.158497	-0.106312	-0.264809
OTUD3	7898602	-0.212545	-0.0875298	-0.200869	-0.288399
PLA2G5	7898609	-0.140012	-0.116064	-0.0510342	-0.167098
PLA2G2F	7898616	-0.0642867	0.0274838	-0.00533105	0.0221527
UBXN10	7898623	0.239139	-0.0141752	0.400451	0.386275
VWA5B1	7898627	-0.126728	-0.156985	-0.0672388	-0.224224
FAM43B	7898653	-0.0593622	-0.0666084	0.0462442	-0.0203641
CDA	7898655	-0.0410999	-0.0435722	-0.180034	-0.223606
ALPL	7898693	-0.16845	0.0219933	-0.102134	-0.0801405
LDLRAD2	7898707	-0.0300025	-0.275703	-0.255279	-0.530982
CELA3B	7898713	-0.210309	-0.130894	-0.0846868	-0.215581
CELA3A	7898725	-0.14308	-0.101354	-0.00841418	-0.109768
HSPC157	7898736	0.155585	0.0180618	0.105018	0.12308
CDC42	7898739	-0.297356	0.21034	-0.105442	0.104898
ZBTB40	7898750	-0.0638766	-0.177182	0.107869	-0.0693122
EPHA8	7898773	-0.00185069	0.0120831	-0.0538241	-0.041741
C1QA	7898793	-0.117287	-0.0985713	-0.119789	-0.21836
C1QC	7898799	-0.0971981	-0.136874	-0.0669636	-0.203837
C1QB	7898805	-0.12336	0.0138374	-0.0732334	-0.0593959
EPHB2	7898809	-0.0714778	0.070114	-0.0557598	0.0143541
KDM1A	7898833	0.231229	0.16763	0.131785	0.299415
C1orf213	7898858	-0.0839642	-0.22638	-0.159686	-0.386066
RPL11	7898875	0.191271	-0.0437388	0.376883	0.333144
TCEB3	7898881	0.237221	0.350333	0.269073	0.619407
C1orf128	7898894	0.415139	0.327699	0.622362	0.950062
GRHL3	7898916	-0.113773	0.028379	-0.0633698	-0.0349908
NIPAL3	7898939	-0.0922564	-0.179066	-0.167461	-0.346527
RCAN3	7898957	0.176777	-0.251843	-0.0498084	-0.301651
C1orf130	7898967	-0.20066	-0.168741	-0.149399	-0.31814
SRRM1	7898975	0.12353	-0.00952346	0.452414	0.44289
CLIC4	7898988	0.133033	0.512839	-0.0399666	0.472872
RHD	7898998	0.106778	0.574714	0.03049	0.605204
TMEM50A	7899005	0.244563	0.389738	0.258756	0.648495
TMEM57	7899018	0.0513047	0.156012	0.100348	0.25636
LDLRAP1	7899023	0.0691194	0.240267	0.0104828	0.25075
MAN1C1	7899029	-0.0491283	-0.263077	-0.0709187	-0.333996
SEPN1	7899043	0.260104	0.0186477	0.227272	0.24592
EXTL1	7899075	-0.0375619	-0.019187	-0.0775579	-0.0967449
PDIK1L	7899087	0.0305114	-0.174883	0.287452	0.112569
GRRP1	7899093	-0.107817	-0.087568	-0.00259856	-0.0901665
ZNF593	7899096	0.426123	0.393772	0.268069	0.661841
CNKSR1	7899101	-0.488628	-0.409847	-0.247527	-0.657375
CATSPER4	7899124	-0.111459	-0.087192	0.0637145	-0.0234775
CCDC21	7899134	0.204035	-0.122534	0.384025	0.261492
SH3BGRL3	7899153	-0.0685952	0.111295	-0.172882	-0.0615873
CD52	7899160	-0.2676	-1.43364	-0.463652	-1.89729
DHDDS	7899173	-0.0621916	0.0734687	0.0324381	0.105907
RPS6KA1	7899192	0.231106	0.344199	-0.0241857	0.320013
ARID1A	7899220	0.0132842	-0.194416	0.0686835	-0.125733
PIGV	7899244	0.244475	0.190008	-0.182658	0.00735015
ZDHHC18	7899253	-0.0799024	-0.35717	0.307987	-0.0491827
SFN	7899265	0.0932972	0.0501342	0.0343684	0.0845026
NUDC	7899273	0.556964	0.655603	0.666986	1.32259
TRNP1	7899284	0.0941887	0.1177	0.0707973	0.188497
WDTC1	7899289	-0.131205	-0.21977	0.151589	-0.0681817
TMEM222	7899310	0.351869	0.512484	0.0560323	0.568516
SYTL1	7899323	0.0808315	-0.226508	-0.00988787	-0.236396
GPR3	7899343	-0.223523	0.0787558	-0.00972977	0.0690261
FAM76A	7899350	0.0783942	-0.000286316	0.259475	0.259188
STX12	7899361	0.0402236	0.164806	-0.036643	0.128163
SCARNA1	7899392	-0.490764	-0.40338	0.395459	-0.00792083
C1orf38	7899394	-0.362677	-1.26842	0.463397	-0.805019
SMPDL3B	7899407	-0.0366744	-0.430402	0.0379125	-0.392489
XKR8	7899417	0.233907	-0.00280638	0.0684744	0.065668
ATPIF1	7899424	0.360212	0.265095	0.325566	0.590661
SESN2	7899436	0.16092	1.01778	-0.150878	0.866905
MED18	7899448	-0.101572	0.00726149	0.0445816	0.0518431
PHACTR4	7899455	0.0679513	-0.319316	0.623318	0.304003
RCC1	7899462	0.597574	0.501682	0.255217	0.756898
SNORA73A	7899480	0.408775	0.28748	0.889904	1.17738
TRNAU1AP	7899486	-0.187323	-0.199923	-0.0799831	-0.279906
RAB42	7899499	0.118355	0.0266436	-0.144765	-0.118121
RNU11	7899502	-0.159751	1.11392	-0.590708	0.52321
GMEB1	7899504	0.281506	0.0958732	0.0924899	0.188363
YTHDF2	7899519	0.226735	0.280602	0.0619101	0.342512
OPRD1	7899528	-0.0911743	-0.145342	-0.0203492	-0.165691
EPB41	7899534	-0.193991	-0.257274	0.334938	0.0776646
PTPRU	7899562	0.0157303	-0.00378051	0.0325306	0.0287501
ZCCHC17	7899604	0.123518	0.171007	-0.0251361	0.145871
TINAGL1	7899627	0.182287	-0.0790592	0.0410061	-0.0380531
HCRTR1	7899643	-0.170082	-0.0932247	-0.166689	-0.259913
KHDRBS1	7899654	0.206582	0.096059	0.109729	0.205788
TMEM39B	7899675	-0.0510722	-0.299092	0.243936	-0.0551558
KPNA6	7899688	0.00264367	0.316512	-0.0650839	0.251428
TXLNA	7899703	0.0410781	0.100895	0.073942	0.174837
CCDC28B	7899719	0.104851	0.241874	0.202275	0.444149
IQCC	7899727	0.227263	0.0470235	0.326382	0.373406
EIF3I	7899737	0.37534	0.497039	0.123348	0.620387
FAM167B	7899750	-0.107551	-0.0293123	-0.0101981	-0.0395104
LCK	7899753	-0.0838202	-0.0271984	-0.276438	-0.303636
HDAC1	7899774	0.230568	0.349207	-0.036345	0.312862
TSSK3	7899790	-0.17472	-0.0975766	-0.129595	-0.227171
ZBTB8B	7899797	-0.210321	-0.380741	0.0704046	-0.310336
RBBP4	7899813	0.37386	0.218875	0.360256	0.579131
KIAA1522	7899821	-0.129456	-0.349083	0.109869	-0.239214
S100PBP	7899829	-0.133469	-0.312256	0.0236783	-0.288577
HPCA	7899841	-0.0190504	0.0240083	-0.00712216	0.0168861
ADC	7899851	-0.113229	0.0957328	-0.313468	-0.217735
ZSCAN20	7899884	0.0422072	0.00272598	0.0620538	0.0647798
C1orf94	7899911	0.0186623	-0.0200461	-0.0651836	-0.0852297
GJB5	7899921	-0.00764943	-0.0536498	-0.139296	-0.192946
GJB4	7899927	-0.14831	0.0123214	-0.0770665	-0.064745
GJB3	7899932	-0.135878	-0.0876458	-0.0303497	-0.117995
GJA4	7899939	-0.0425172	0.684437	-0.352797	0.33164
ZMYM1	7899943	-0.317467	-0.56386	0.275001	-0.288859
ZMYM4	7899957	-0.0771947	-0.0887	0.0135351	-0.0751648
NCDN	7899990	0.0211967	-0.250668	0.221084	-0.0295843
TFAP2E	7900001	-0.10403	-0.0884148	-0.02603	-0.114445
EIF2C4	7900009	-0.0859286	-0.625354	-0.181269	-0.806623
EIF2C1	7900030	-0.0187695	-0.111229	-0.0438617	-0.15509
EIF2C3	7900051	-0.4784	-0.181135	-0.475592	-0.656727
TEKT2	7900076	0.213514	0.0609047	0.00984524	0.0707499
ADPRHL2	7900087	0.333605	0.181937	0.283304	0.465241
MAP7D1	7900095	-0.145402	-0.160208	-0.0200644	-0.180272
THRAP3	7900119	0.212368	0.1189	0.450319	0.569218
C1orf113	7900129	-0.284982	-0.610659	-0.207742	-0.818401
ZC3H12A	7900146	-0.229561	0.301363	-0.256107	0.0452563
DNALI1	7900159	-0.0537051	0.0356033	-0.153993	-0.11839
CDCA8	7900167	1.37837	1.24146	0.967805	2.20927
MANEAL	7900183	-0.123894	0.123319	0.200295	0.323614
C1orf122	7900192	0.206203	0.240731	-0.0155525	0.225179
UTP11L	7900201	0.705646	0.877606	0.683412	1.56102
AKIRIN1	7900216	0.168969	0.41677	-0.00792993	0.40884
NDUFS5	7900228	0.345702	0.359398	0.158879	0.518277
MACF1	7900235	-0.486364	-0.367511	-0.576953	-0.944464
BMP8A	7900340	-0.0217012	-0.0278119	0.00262698	-0.0251849
PPIE	7900354	0.0180637	-0.0349033	0.0857495	0.0508461
MFSD2A	7900365	0.675666	1.50751	-0.0377824	1.46972
CAP1	7900382	0.0580275	0.527941	-0.263724	0.264217
RLF	7900395	-0.27391	0.0596659	-0.197059	-0.137393
TMCO2	7900409	-0.0405764	-0.0884394	-0.205258	-0.293697
ZMPSTE24	7900413	0.413153	0.797215	0.26455	1.06176
SMAP2	7900426	0.155956	0.161495	0.547691	0.709186
ZNF643	7900438	0.263541	-0.148636	0.17172	0.0230838
ZNF642	7900446	0.347514	0.170405	0.436506	0.606911
DEM1	7900454	0.200846	0.0572759	0.413869	0.471145
ZNF684	7900461	-0.00074117	-0.0225206	0.114268	0.0917478
KCNQ4	7900492	0.153193	0.356708	0.164754	0.521462
CTPS	7900510	1.0799	1.21298	0.252052	1.46503
GUCA2B	7900531	-0.0272253	-0.0508338	-0.0232152	-0.0740489
RIMKLA	7900540	-0.111485	-0.10387	0.0553993	-0.0484708
PPCS	7900546	-0.0142057	0.00936569	0.211651	0.221016
CCDC30	7900555	-0.490192	-0.429189	-0.186497	-0.615686
PPIH	7900576	0.144062	0.0352641	0.311192	0.346456
YBX1	7900585	0.307022	0.312858	0.252131	0.564989
ERMAP	7900609	0.27122	-0.0907637	0.242724	0.151961
ZNF691	7900624	0.262303	-0.300667	0.543722	0.243056
FAM183A	7900635	-0.10907	-0.132635	0.0353082	-0.0973264
WDR65	7900639	-0.294311	-0.13772	-0.186886	-0.324606
TMEM125	7900654	-0.18993	-0.2147	-0.177707	-0.392407
TIE1	7900658	-0.171415	0.257002	-0.516161	-0.259159
MPL	7900683	-0.0755406	-0.507328	-0.436374	-0.943702
CDC20	7900699	1.52252	1.86069	0.839449	2.70014
C1orf84	7900710	-0.198109	-0.267928	-0.100931	-0.368859
PTPRF	7900792	0.0617528	0.360087	-0.0339184	0.326168
KDM4A	7900833	0.313579	-0.00785058	0.24554	0.237689
ST3GAL3	7900857	0.150102	0.214275	-0.314972	-0.100696
ARTN	7900878	0.240488	0.395229	0.1469	0.54213
IPO13	7900888	0.330403	0.365675	0.332357	0.698033
DPH2	7900911	0.404503	0.61819	0.195345	0.813534
ATP6V0B	7900922	0.187431	0.222711	-0.0261848	0.196526
B4GALT2	7900931	0.621869	0.719953	0.372585	1.09254
CCDC24	7900944	-0.163017	0.0509219	-0.181287	-0.130365
KLF17	7900957	-0.166588	-0.0604343	-0.214884	-0.275319
DMAP1	7900962	0.0449313	0.0809772	0.0149614	0.0959386
RNF220	7900979	-0.106509	-0.535078	0.060323	-0.474755
C1orf228	7900999	0.465905	-0.19301	-0.17983	-0.37284
KIF2C	7901010	1.63662	1.59698	0.882338	2.47932
RPS8	7901038	0.317719	0.0672707	0.0299851	0.0972558
SNORD55	7901046	-0.0259479	0.218457	6.22285e-05	0.218519
SNORD46	7901048	-0.170155	-0.317655	0.625378	0.307723
SNORD38A	7901050	0.220855	0.120861	-0.212801	-0.0919405
SNORD38B	7901052	0.54424	0.299605	0.191914	0.491519
PLK3	7901054	-0.0263821	0.898545	-0.33921	0.559335
UROD	7901073	0.614298	0.777277	0.394387	1.17166
HPDL	7901087	0.932217	0.711263	0.410547	1.12181
TOE1	7901091	-0.0541403	0.229204	0.178213	0.407417
MMACHC	7901102	0.442227	0.133007	0.475958	0.608964
AKR1A1	7901110	0.30963	0.257301	-0.34014	-0.0828386
NASP	7901123	0.487338	0.558401	0.173824	0.732225
TMEM69	7901135	0.24471	0.0434401	0.583817	0.627257
MAST2	7901140	0.132683	0.0348445	0.213012	0.247856
TSPAN1	7901175	-0.0952942	-0.134196	-0.0517861	-0.185982
C1orf190	7901187	-0.178717	-0.549325	-0.22679	-0.776115
RAD54L	7901192	1.12977	1.12921	0.461139	1.59035
NSUN4	7901219	-0.00924874	0.212448	0.080152	0.2926
FAAH	7901229	0.0328778	-0.281465	-0.14056	-0.422025
DMBX1	7901247	-0.144898	-0.038736	-0.120749	-0.159485
C1orf223	7901253	0.0440248	0.0177899	-0.0213137	-0.00352374
CYP4B1	7901256	-0.0793103	-0.0336397	-0.134899	-0.168538
CYP4X1	7901272	0.139936	0.00370466	-0.0400235	-0.0363188
CYP4Z1	7901287	-0.155847	-0.0652913	-0.189976	-0.255267
CYP4A22	7901293	-0.296549	-0.187907	-0.253615	-0.441522
CMPK1	7901299	0.00433217	-0.0792728	0.266826	0.187553
FOXE3	7901309	-0.0653712	-0.00115524	0.0499827	0.0488275
FOXD2	7901311	-0.00556468	-0.073065	0.0904172	0.0173522
SLC5A9	7901316	-0.244647	-0.0589619	-0.110672	-0.169634
ELAVL4	7901342	-0.33697	-0.15765	-0.162577	-0.320227
CDKN2C	7901363	0.421968	0.235246	0.273956	0.509201
RNF11	7901376	-0.457664	0.113169	0.0118489	0.125018
OSBPL9	7901385	0.0673164	0.0600899	0.206206	0.266296
ZFYVE9	7901426	-0.214063	-0.645706	0.118013	-0.527693
PRPF38A	7901447	0.0994136	0.0726922	0.203452	0.276144
GPX7	7901460	0.727214	0.435397	0.53407	0.969467
FAM159A	7901466	0.00718244	-0.108775	0.0411927	-0.0675824
ZYG11B	7901479	0.0682713	0.052739	0.255112	0.307851
ZYG11A	7901497	0.0621945	0.00201122	-0.027079	-0.0250678
SCP2	7901513	-0.151088	-0.753839	-0.253572	-1.00741
PODN	7901535	-0.0106426	-0.0408007	0.0134852	-0.0273155
CPT2	7901549	0.214902	0.0206989	0.275715	0.296414
DMRTB1	7901557	-0.115092	-0.0763223	0.00486998	-0.0714523
DIO1	7901565	-0.094392	0.0188468	-0.119048	-0.100201
LRRC42	7901577	0.479228	0.382895	0.508514	0.891409
C1orf83	7901592	-0.134882	-0.165772	-0.0579314	-0.223703
MRPL37	7901601	0.626118	0.490106	0.258317	0.748423
C1orf175	7901634	-0.728991	-0.945306	-0.450701	-1.39601
TTC4	7901662	0.148418	0.336994	0.0992106	0.436205
C1orf177	7901675	-0.0662402	-0.0840596	-0.00514906	-0.0892087
TMEM61	7901687	-0.00514783	-0.0759423	-0.0687413	-0.144684
BSND	7901691	-0.139051	-0.175685	-0.0101066	-0.185792
PCSK9	7901696	-0.101362	-0.118531	-0.0152387	-0.13377
PRKAA2	7901720	-0.715085	-0.70366	0.0622941	-0.641366
C8A	7901732	-0.132671	0.039658	-0.198518	-0.15886
FGGY	7901748	-0.568666	-0.768188	-0.311416	-1.0796
HOOK1	7901765	-1.01819	-0.571157	0.60098	0.0298229
NFIA	7901788	0.0296967	-0.522397	1.41933	0.896937
MGC34796	7901802	-0.122529	0.113529	-0.129523	-0.015994
INADL	7901804	-0.847489	-0.835214	-0.294062	-1.12928
L1TD1	7901860	-0.0313861	-0.0148839	-0.0486167	-0.0635005
USP1	7901867	0.512313	0.627821	0.574186	1.20201
ANGPTL3	7901883	-0.117248	0.039051	-0.176351	-0.137301
ATG4C	7901895	0.204179	-0.590845	0.267093	-0.323753
FOXD3	7901913	0.257188	0.134792	0.0556598	0.190452
ALG6	7901915	-0.122563	-0.274613	0.156327	-0.118286
EFCAB7	7901931	-0.234736	-0.288123	0.0777228	-0.2104
DLEU2L	7901948	-0.0897238	-0.149687	0.172226	0.0225393
PGM1	7901951	0.430664	0.234118	0.0931285	0.327246
ROR1	7901969	-0.166978	-0.0251064	-0.164285	-0.189392
UBE2U	7901982	-0.0054027	-0.0347035	0.0654773	0.0307738
CACHD1	7901993	-0.380272	-0.00137511	-0.322863	-0.324238
RAVER2	7902023	0.339242	-0.37759	0.646435	0.268845
DNAJC6	7902043	0.783892	1.58227	0.264893	1.84717
LEPR	7902074	0.110294	1.18139	0.35573	1.53712
PDE4B	7902104	-0.440799	-0.687909	-0.285295	-0.973204
SGIP1	7902127	-0.710594	-1.3144	-0.365743	-1.68014
TCTEX1D1	7902158	-0.473101	-2.16827	-0.608761	-2.77703
MIER1	7902166	-0.0364326	-0.0370956	0.0374679	0.000372336
IL23R	7902189	-0.157658	-0.113806	0.22907	0.115264
IL12RB2	7902205	-0.789731	-1.56396	-0.247786	-1.81175
GADD45A	7902227	-0.00968705	0.696192	0.235322	0.931514
LRRC7	7902235	0.796477	0.697276	1.16097	1.85825
PIN1L	7902267	0.196672	0.172569	0.139309	0.311878
SRSF11	7902269	-0.127867	-0.00236359	-0.0486306	-0.0509942
HHLA3	7902282	0.128867	-0.282364	0.625579	0.343215
CTH	7902290	0.133788	0.592676	0.25696	0.849637
FPGT	7902308	-0.524675	-0.585704	0.153462	-0.432242
TNNI3K	7902317	-0.447169	-0.482433	-0.167295	-0.649728
TYW3	7902345	0.102681	0.239845	0.204034	0.443879
LHX8	7902353	-0.013142	-0.0455051	-0.0333329	-0.078838
ACADM	7902367	0.310895	0.367192	0.160714	0.527906
RABGGTB	7902382	0.213007	0.290766	0.264137	0.554903
SNORD45C	7902396	0.0759266	0.18146	-0.0365897	0.14487
SNORD45A	7902398	0.218816	0.048148	0.739798	0.787946
SNORD45B	7902400	-0.0151233	0.0157216	0.466906	0.482628
MSH4	7902402	-0.0546128	0.164696	0.0475187	0.212215
AK5	7902452	1.18903	0.0358339	-0.0631619	-0.027328
FAM73A	7902476	-0.236995	-0.057475	-0.418599	-0.476074
NEXN	7902495	0.36858	1.58495	-0.113936	1.47101
DNAJB4	7902512	-0.337767	0.218806	-0.0984694	0.120337
GIPC2	7902518	-1.04847	-1.40958	-0.0251571	-1.43474
PTGFR	7902527	0.046851	0.0628712	-0.048914	0.0139572
IFI44L	7902541	-0.936736	0.190795	0.113807	0.304602
IFI44	7902553	-0.343882	0.463822	0.252054	0.715875
LPHN2	7902565	0.299052	0.229963	-0.211469	0.0184939
PRKACB	7902594	-0.107045	-0.313446	0.10828	-0.205165
LOC100128775	7902611	-0.116503	-0.153453	0.0418008	-0.111652
SAMD13	7902617	0.349461	-0.834888	0.868094	0.0332059
DNASE2B	7902623	-0.0878889	-0.117286	-0.00255207	-0.119838
RPF1	7902634	0.248667	0.383466	0.306731	0.690197
SPATA1	7902645	0.0223329	0.108783	-0.0250205	0.0837623
WDR63	7902660	0.12341	0.111057	-0.0232236	0.087833
CYR61	7902687	-0.0202607	0.400724	-0.306683	0.0940407
CLCA2	7902702	0.0633072	0.100702	0.0286102	0.129313
CLCA1	7902721	-0.230866	-0.0426399	-0.0379736	-0.0806136
CLCA4	7902738	-0.156302	-0.0826003	0.0301259	-0.0524745
CLCA3P	7902754	-0.0830521	-0.00622957	-0.0977511	-0.103981
SH3GLB1	7902771	0.0659249	0.245065	-0.0453994	0.199666
HS2ST1	7902789	0.189538	0.360341	0.248055	0.608396
LMO4	7902810	1.00069	0.0341544	0.226187	0.260342
PKN2	7902822	-0.465027	-0.262996	-0.416494	-0.67949
GBP6	7902850	-0.300479	0.101183	-0.0411776	0.0600053
LRRC8B	7902861	-0.204286	0.640869	-0.291893	0.348977
LRRC8C	7902874	0.219878	0.257867	-0.139695	0.118173
LRRC8D	7902883	0.0461337	0.0786287	-0.161382	-0.0827534
ZNF326	7902891	-0.34348	0.0516057	0.133029	0.184635
CDC7	7902913	0.492668	0.412387	0.383066	0.795453
HSP90B3P	7902930	0.0784515	0.0830184	0.478577	0.561595
BRDT	7902934	-0.0539198	-0.109423	0.12079	0.0113676
EPHX4	7902957	-0.166604	-0.163494	-0.107159	-0.270654
BTBD8	7902965	-0.543562	-0.810499	-0.0612164	-0.871715
KIAA1107	7902977	-0.28615	-0.954244	0.458132	-0.496112
C1orf146	7902984	0.0817316	-0.0915194	0.101127	0.00960738
RPAP2	7902992	-0.360162	-0.344057	-0.22584	-0.569897
SNORD21	7903022	-0.153659	-0.112836	0.257681	0.144845
MTF2	7903032	-0.109636	-0.10692	-0.367503	-0.474423
CCDC18	7903049	0.17172	0.0109945	0.420995	0.43199
DR1	7903079	-0.0194697	0.384029	-0.079428	0.304601
FNBP1L	7903092	-0.310675	0.0866792	-0.146497	-0.0598176
ABCD3	7903119	0.208785	0.257344	0.27804	0.535384
SLC44A3	7903144	-0.0739878	-0.0989376	-0.10425	-0.203188
TMEM56	7903162	0.0754507	-0.137144	-0.08357	-0.220714
RWDD3	7903171	0.0269719	-0.218442	0.175127	-0.0433149
PTBP2	7903188	-0.341999	0.076195	-0.672086	-0.595891
SNX7	7903203	-0.137549	-0.472922	-0.113089	-0.586011
LPPR4	7903214	-0.274048	-0.0708544	-0.200301	-0.271155
PALMD	7903227	0.0123691	-0.153903	0.1493	-0.00460247
AGL	7903239	-0.0590653	0.416182	0.339691	0.755873
SLC35A3	7903281	-0.17918	0.113605	0.155062	0.268668
HIAT1	7903294	0.0399827	0.338301	0.134127	0.472428
CCDC76	7903308	-0.352759	-0.395291	0.18333	-0.211961
RTCD1	7903321	0.000428898	0.149805	0.0258542	0.17566
CDC14A	7903334	-0.283766	0.00925561	-0.0320756	-0.02282
GPR88	7903355	-0.0871214	0.112868	-0.0134758	0.0993918
VCAM1	7903358	-0.216236	0.346454	0.209778	0.556232
SLC30A7	7903369	0.153034	0.290371	0.297107	0.587478
S1PR1	7903393	-0.499926	-1.26988	0.116503	-1.15337
HEJ1	7903401	-0.116964	-0.0685509	-0.199262	-0.267813
RNPC3	7903404	-0.772489	-1.33926	-0.0637754	-1.40304
AMY2B	7903407	-0.915403	-1.66265	-0.434489	-2.09714
AMY2A	7903414	-1.05171	-1.2827	-0.630053	-1.91275
PRMT6	7903457	0.282255	0.231462	0.635701	0.867163
NTNG1	7903461	0.0144695	0.0679008	0.0036822	0.071583
NBPF6	7903490	-0.352778	0.0307444	-0.0456689	-0.0149245
FAM102B	7903507	0.234502	0.219084	-0.0998054	0.119279
PRPF38B	7903519	-0.270224	-0.102787	-0.091633	-0.19442
FNDC7	7903530	0.0034921	0.443907	-0.102238	0.341669
STXBP3	7903541	-0.0918872	-0.0169853	0.0889162	0.0719309
LOC642864	7903561	-0.0417111	-0.179867	0.0849642	-0.0949027
GPSM2	7903565	-0.239928	-1.32014	0.490609	-0.829531
KIAA1324	7903592	-0.0480296	0.223378	-0.0853056	0.138072
SARS	7903619	0.300479	0.573233	0.119189	0.692422
CELSR2	7903632	0.0716497	0.0530623	0.0183619	0.0714242
SYPL2	7903667	-0.153586	-0.119178	-0.0765596	-0.195737
ATXN7L2	7903676	0.0778449	0.0158705	0.0183095	0.03418
CYB561D1	7903688	-0.0947825	-0.128653	-0.11219	-0.240842
GPR61	7903694	-0.145911	-0.149678	-0.0701068	-0.219785
GNAI3	7903703	0.263423	0.437878	0.347648	0.785527
AMPD2	7903719	0.00372295	-0.0447733	-0.207995	-0.252768
GSTM4	7903742	0.636256	0.149607	0.434083	0.583691
GSTM2	7903753	-0.111034	-1.05667	0.0925805	-0.964086
GSTM1	7903765	0.450649	-0.940389	0.357242	-0.583148
GSTM5	7903777	-0.149038	0.383025	0.135766	0.518791
CSF1	7903786	1.69422	1.55261	1.22033	2.77293
AHCYL1	7903803	0.48475	0.331352	0.249438	0.58079
FAM40A	7903827	-0.0386283	0.11542	-0.0117442	0.103676
UBL4B	7903851	-0.180502	-0.0149568	-0.169149	-0.184106
SLC6A17	7903854	0.040819	0.00426532	0.0516608	0.0559261
KCNC4	7903867	-0.119148	-0.133704	-0.0625116	-0.196215
RBM15	7903878	-0.183367	0.0119453	-0.352131	-0.340186
PROK1	7903884	-0.175288	-0.0835465	-0.0641092	-0.147656
CD53	7903893	-0.129484	-0.871103	0.161858	-0.709245
CEPT1	7903908	-0.0245658	0.0479088	-0.00659965	0.0413091
CHI3L2	7903920	-0.024429	0.0339228	-0.0119065	0.0220163
LOC149620	7903935	-0.197844	0.0333795	-0.295684	-0.262305
CHIA	7903945	0.0647681	0.0783789	-0.0782624	0.000116549
C1orf88	7903959	0.116608	0.108088	0.0448971	0.152985
ATP5F1	7903972	0.329361	0.263803	0.50717	0.770973
C1orf162	7903980	0.166009	-0.928097	0.0302905	-0.897806
RAP1A	7903988	-0.0394185	0.0792781	0.32589	0.405168
DDX20	7904000	0.358244	0.367199	0.478216	0.845415
CTTNBP2NL	7904018	-0.448738	0.0714039	0.0408172	0.112221
WNT2B	7904025	-0.331637	-0.177498	-0.342748	-0.520246
CAPZA1	7904036	0.208556	0.323263	0.0470051	0.370269
MOV10	7904050	-0.134346	-0.0379937	0.19283	0.154837
FAM19A3	7904073	0.038251	0.00584416	-0.054531	-0.0486869
AFARP1	7904084	-0.114794	-0.146803	-0.217503	-0.364306
LRIG2	7904086	-0.243284	-0.298849	-0.27018	-0.569029
MAGI3	7904106	-0.187181	-0.566274	-0.141541	-0.707815
DCLRE1B	7904131	1.03214	0.713748	0.780636	1.49438
HIPK1	7904137	0.209931	0.121383	0.11362	0.235002
OLFML3	7904158	0.00349773	0.104649	-0.0103647	0.0942843
SYCP1	7904168	0.0855381	0.0546501	-0.0698951	-0.015245
TSHB	7904203	-0.00848068	-0.135664	0.0521836	-0.0834804
VANGL1	7904211	0.520554	0.413329	0.604444	1.01777
SLC22A15	7904226	0.344592	-0.218795	-0.191632	-0.410427
C1orf161	7904244	-0.233066	0.0120519	-0.213164	-0.201112
ATP1A1	7904254	0.187783	0.209355	0.159798	0.369154
CD2	7904287	-0.0176902	0.336718	-0.0592039	0.277514
PTGFRN	7904293	0.404179	0.588107	0.828727	1.41683
CD101	7904303	0.257642	-0.0889699	-0.103557	-0.192527
TTF2	7904314	0.330003	0.553666	0.299379	0.853045
MAN1A2	7904340	-0.152406	-0.203563	-0.0285176	-0.232081
FAM46C	7904361	0.25841	0.386709	0.325824	0.712533
WDR3	7904364	0.460154	0.611499	0.153842	0.76534
HAO2	7904396	-0.0558124	-0.0567121	0.0244451	-0.032267
HSD3B2	7904408	0.0126169	-0.0388806	0.0147367	-0.0241439
LOC128102	7904429	-0.233196	-0.231902	-0.1399	-0.371802
PHGDH	7904433	0.865278	0.314968	-0.0492228	0.265745
HIST2H2BA	7904465	0.339186	0.00555039	0.574661	0.580211
LOC51152	7904478	-0.571152	-0.463883	-0.54447	-1.00835
NBPF14	7904562	-0.426124	-0.254012	-0.237235	-0.491247
NBPF10	7904574	-0.561172	-0.388021	-0.383093	-0.771114
SEC22B	7904695	0.0918087	0.00382582	0.406964	0.41079
NOTCH2NL	7904702	-0.512058	-0.213075	-0.438546	-0.65162
HFE2	7904717	0.0265853	-0.0896165	-0.00876292	-0.0983794
TXNIP	7904726	0.0244842	0.337847	-0.133034	0.204813
ANKRD34A	7904737	-0.122194	-0.183581	-0.0182732	-0.201854
LIX1L	7904742	0.0555684	-0.17964	0.303314	0.123675
PEX11B	7904755	0.24542	0.0504001	0.237029	0.287429
ITGA10	7904761	-0.246609	0.0884114	-0.180837	-0.092426
ANKRD35	7904796	-0.0178566	0.207063	-0.165517	0.0415459
PIAS3	7904812	-0.355376	-0.155364	-0.11968	-0.275044
RNF115	7904830	-0.00448631	0.165003	0.0827508	0.247754
PDZK1	7904843	-0.207606	-0.0396356	-0.291044	-0.330679
GPR89A	7904853	-0.238993	-0.0861323	-0.0541055	-0.140238
PDIA3P	7904881	0.12621	0.47538	0.253311	0.72869
CHD1L	7904883	0.276747	0.059351	0.000422173	0.0597732
BCL9	7904907	-0.567037	-0.687882	0.0896372	-0.598244
GJA8	7904927	-0.0219499	0.0253035	-0.0107924	0.0145111
C1orf152	7904974	0.207153	0.352121	0.271346	0.623467
HIST2H2AC	7905088	0.171597	0.0969708	0.788361	0.885332
BOLA1	7905092	0.193483	0.0120009	0.143338	0.155339
VPS45	7905099	-0.0171464	0.111827	0.153994	0.265821
PLEKHO1	7905116	-0.366253	-0.643569	-0.803926	-1.44749
CA14	7905131	-0.113294	-0.109063	-0.0882299	-0.197293
C1orf54	7905147	-0.140838	0.2339	-0.21355	0.0203505
C1orf51	7905154	-0.329023	0.152896	0.00189897	0.154795
MRPS21	7905163	0.176846	-0.0211315	0.411761	0.39063
PRPF3	7905171	-0.289876	-0.055046	0.0948195	0.0397735
RPRD2	7905185	0.0592591	-0.206934	0.31648	0.109547
TARS2	7905198	0.0226014	0.188812	-0.12419	0.0646228
ECM1	7905220	0.198521	0.359421	0.0535008	0.412922
SETDB1	7905258	0.0862325	-0.182767	0.0131429	-0.169624
ANXA9	7905283	0.04523	-0.0839316	-0.0816455	-0.165577
PRUNE	7905299	0.297318	0.0560782	0.396534	0.452613
BNIPL	7905308	-0.170685	-0.0708935	-0.122938	-0.193831
C1orf56	7905324	0.0325792	-0.302428	0.250192	-0.0522353
MLLT11	7905329	0.879598	0.70564	0.414043	1.11968
GABPB2	7905339	-0.0105877	0.0637426	0.18269	0.246432
TNFAIP8L2	7905349	-0.200847	-0.20775	0.0726032	-0.135147
SCNM1	7905355	0.380017	0.548852	0.0505224	0.599374
PIP5K1A	7905365	0.205813	0.525577	0.0027997	0.528377
PSMD4	7905374	0.181743	0.351171	-0.0279021	0.323269
ZNF687	7905382	0.092752	-0.0145488	0.102049	0.0875
PSMB4	7905395	0.0117292	0.262096	0.0295315	0.291628
CGN	7905406	-0.00182573	0.0254229	-0.102509	-0.0770859
TUFT1	7905428	-0.120616	0.742484	-0.130645	0.611839
SNX27	7905444	0.158311	-0.093504	0.0279581	-0.0655459
C1orf230	7905464	-0.27444	-0.0922865	0.0121865	-0.0801
OAZ3	7905474	-0.0274356	-0.0223954	-0.00824716	-0.0306426
LCE5A	7905483	-0.0977936	-0.0929733	0.0410048	-0.0519685
CRCT1	7905486	-0.194376	-0.0845012	-0.151489	-0.23599
LCE3C	7905490	-0.105926	-0.0122008	-0.0240087	-0.0362095
LCE3B	7905492	-0.103563	-0.0080123	-0.189758	-0.197771
C1orf46	7905496	-0.277562	-0.0103624	-0.0938939	-0.104256
LCE2D	7905500	-0.258298	0.0207819	-0.336698	-0.315916
LCE2C	7905503	-0.207875	-0.154247	0.0405156	-0.113732
LCE2B	7905505	-0.26129	-0.0365875	-0.333134	-0.369721
LCE2A	7905507	-0.33736	-0.232137	-0.193251	-0.425388
LCE4A	7905510	-0.24472	0.0363786	-0.199421	-0.163042
C1orf68	7905512	-0.171259	0.0265524	-0.131308	-0.104755
KPRP	7905515	-0.106328	-0.00341867	0.0156985	0.0122798
LCE1F	7905517	-0.0302531	-0.0317698	-0.00619637	-0.0379661
LCE1E	7905519	-0.246399	-0.111925	-0.271043	-0.382968
LCE1D	7905523	-0.211747	-0.0653998	-0.29577	-0.36117
LCE1B	7905525	0.00189272	-0.0384036	-0.0486842	-0.0870878
LCE1A	7905528	-0.103959	-0.102146	-0.114845	-0.216991
SMCP	7905530	-0.0120651	-0.0667478	-0.0593972	-0.126145
IVL	7905533	-0.127952	-0.0454767	0.00840511	-0.0370716
SPRR4	7905536	-0.372817	-0.174319	-0.333203	-0.507522
SPRR1A	7905544	-0.273768	-0.202447	-0.0435765	-0.246023
SPRR3	7905548	-0.158399	-0.0822189	-0.0871919	-0.169411
SPRR1B	7905553	-0.362325	-0.321553	-0.0963583	-0.417912
LELP1	7905559	-0.18628	0.0190029	-0.132271	-0.113268
LOR	7905563	-0.117145	0.0429324	-0.091557	-0.0486246
S100A9	7905571	0.0790128	-0.120545	0.0897823	-0.0307628
S100A7A	7905576	-0.156995	0.0138216	-0.121607	-0.107785
S100A1	7905581	0.0649793	0.0330951	-0.0621717	-0.0290766
SNAPIN	7905598	0.240485	0.0908391	0.143294	0.234133
NPR1	7905606	-0.00104589	-0.0370211	0.0259395	-0.0110816
SLC27A3	7905664	0.306345	-0.136832	-0.0129003	-0.149733
CREB3L4	7905677	0.0863884	-0.350834	0.0174929	-0.333341
UBAP2L	7905700	0.111	0.117416	0.260443	0.377859
HAX1	7905733	0.3922	0.45498	0.405256	0.860236
AQP10	7905746	0.00536863	0.0224386	0.239345	0.261784
ATP8B2	7905754	-0.550856	-0.0575817	-0.428523	-0.486105
IL6R	7905789	-0.261871	-0.964631	-0.481029	-1.44566
TDRD10	7905801	-0.441909	0.026735	-0.414679	-0.387944
CHRNB2	7905817	-0.00942833	0.014396	-0.0718372	-0.0574412
FLAD1	7905831	0.197874	0.243531	0.115007	0.358538
LENEP	7905848	-0.337094	-0.19176	-0.210209	-0.401969
ZBTB7B	7905854	-0.104947	-0.0596916	-0.0077408	-0.0674324
DCST1	7905862	-0.132752	-0.0701497	-0.131137	-0.201287
ADAM15	7905881	0.342953	0.161316	0.0645384	0.225854
EFNA4	7905909	0.0999534	-0.695849	0.507319	-0.18853
EFNA3	7905918	-0.0838541	-0.4074	-0.122898	-0.530299
EFNA1	7905929	-0.309158	-0.464724	-0.372783	-0.837508
RAG1AP1	7905938	-0.0119742	-0.0604869	-0.2965	-0.356987
TRIM46	7905951	-0.260808	-0.300171	-0.139841	-0.440012
MTX1	7905968	0.415893	0.451159	0.324561	0.77572
HCN3	7905974	-0.0936904	-0.0400561	0.0706141	0.030558
RUSC1	7905999	0.0901303	0.274496	0.0177698	0.292266
POU5F1P4	7906017	-0.261167	-0.0421503	-0.165584	-0.207735
MSTO1	7906021	-0.176434	-0.043061	0.149427	0.106366
DAP3	7906041	0.191148	0.181101	0.173892	0.354992
MSTO2P	7906056	-0.239457	-0.0620621	0.110319	0.0482568
SYT11	7906061	-0.234282	-0.412563	-0.293806	-0.70637
RXFP4	7906069	-0.236618	-0.0841955	-0.252184	-0.33638
ROBLD3	7906072	0.435896	0.216904	0.481601	0.698504
RAB25	7906079	0.00767917	-0.0111916	0.063488	0.0522965
LMNA	7906085	0.527783	1.74937	0.0376626	1.78703
SEMA4A	7906107	0.336296	0.721097	-0.346771	0.374326
SLC25A44	7906128	0.150652	0.205263	0.171349	0.376612
PMF1	7906133	-0.0703046	-0.0349419	-0.0262692	-0.0612111
BGLAP	7906140	-0.0823867	-0.29661	-0.0376911	-0.334301
TMEM79	7906146	-0.0572402	0.0730466	-0.0839608	-0.0109143
C1orf182	7906154	0.268284	0.12081	0.206031	0.326841
RHBG	7906163	-0.046212	-0.0751785	0.00892139	-0.0662571
TTC24	7906177	-0.278254	-0.612773	-0.343809	-0.956582
APOA1BP	7906185	0.479942	0.217053	0.293839	0.510892
HAPLN2	7906197	-0.102202	-0.126949	0.0296941	-0.0972551
BCAN	7906205	0.0483596	-0.0555286	0.0386143	-0.0169143
C1orf66	7906223	0.472793	0.0754503	0.526234	0.601685
PRCC	7906235	0.0302783	0.315226	-0.181864	0.133362
NTRK1	7906244	0.823419	0.703727	0.205901	0.909627
PEAR1	7906264	-0.801746	-0.178269	-0.417564	-0.595833
C1orf92	7906284	-0.16563	-0.0680847	-0.044783	-0.112868
KIRREL	7906307	-0.186984	0.109995	-0.317829	-0.207834
CD1D	7906330	-0.00150939	-0.0550309	-0.0244351	-0.079466
CD1A	7906339	-0.103545	-0.159251	-0.12796	-0.287211
CD1C	7906348	-0.0445081	-0.108066	-0.0647153	-0.172781
CD1E	7906355	0.0430365	-0.101869	-0.206621	-0.30849
OR10K1	7906365	-0.223216	0.016824	-0.101023	-0.0841995
OR10R2	7906367	-0.236245	0.0136373	-0.172141	-0.158504
OR10R3P	7906370	-0.11054	-0.0688343	-0.039012	-0.107846
OR10Z1	7906372	-0.140614	-0.122277	-0.0491228	-0.1714
OR6K6	7906374	0.0283062	0.0205711	-0.0930927	-0.0725216
MNDA	7906377	1.35256	-0.0916351	0.366037	0.274402
PYHIN1	7906386	0.108461	-0.00851022	0.0238979	0.0153877
IFI16	7906400	-0.186823	-0.666835	-0.206353	-0.873188
CADM3	7906417	-0.0598091	0.201999	0.0724636	0.274463
DARC	7906435	-0.168996	0.528636	0.622388	1.15102
FCER1A	7906443	0.753007	0.0839928	1.55339	1.63738
OR10J1	7906452	-0.101633	-0.0333379	-0.116471	-0.149809
APCS	7906458	-0.18909	-0.147501	-0.196698	-0.344199
DUSP23	7906469	0.300218	0.33385	0.358011	0.691861
FCRL6	7906475	-0.0701269	-0.0945448	-0.110883	-0.205428
SLAMF8	7906486	0.284156	0.183819	0.0487814	0.232601
KCNJ9	7906496	-0.0338787	-0.0457348	-0.080484	-0.126219
ATP1A2	7906501	-0.024526	-0.0778601	0.00206955	-0.0757905
ATP1A4	7906527	-0.17553	-0.0677636	-0.0479994	-0.115763
CASQ1	7906552	0.0489417	-0.0686022	0.122109	0.053507
PEA15	7906564	0.0768998	0.196548	0.0656911	0.262239
SUMO1P3	7906574	0.146027	0.344958	-0.329442	0.0155156
NCSTN	7906576	0.200713	-0.116473	0.0486951	-0.0677782
NHLH1	7906597	0.0334125	0.119027	-0.0416105	0.0774161
VANGL2	7906602	0.0465813	0.269398	0.140924	0.410322
SLAMF7	7906613	0.317352	0.45783	0.0681984	0.526029
LY9	7906622	-0.0992672	0.0297764	-0.184462	-0.154686
KLHDC9	7906642	-0.0749426	-0.251557	-0.000164491	-0.251721
NIT1	7906652	0.0728821	-0.101088	-0.0998464	-0.200935
UFC1	7906662	0.063823	-0.307715	0.224899	-0.0828167
USP21	7906671	0.337896	0.00182879	0.401659	0.403488
PPOX	7906688	0.131214	-0.137729	0.149108	0.0113791
NDUFS2	7906703	0.404653	0.237077	0.437673	0.67475
FCER1G	7906720	1.21041	1.29993	-0.0555499	1.24438
TOMM40L	7906728	0.103111	0.247008	0.0503837	0.297392
PCP4L1	7906742	-0.213361	0.0367111	-0.12529	-0.0885793
FCGR2A	7906757	3.2696	4.4043	1.15755	5.56186
HSPA6	7906764	-0.16611	1.82338	-0.791777	1.0316
FCGR2C	7906767	1.46813	2.36268	0.121271	2.48395
HSPA7	7906775	-0.0126111	1.53951	-0.659736	0.879775
FCGR2B	7906777	0.365746	0.679111	-0.633477	0.0456335
FCRLA	7906786	-0.263379	-0.177918	-0.035331	-0.213249
FCRLB	7906797	0.136277	0.0350841	0.0197585	0.0548426
DUSP12	7906810	0.379802	0.463665	0.336912	0.800577
ATF6	7906819	0.00904156	0.0812387	0.0425813	0.12382
NOS1AP	7906838	-0.45136	0.278862	-0.678321	-0.399458
UHMK1	7906852	-0.0468915	0.338816	0.0453926	0.384208
UAP1	7906863	0.0218226	0.0207267	0.234974	0.255701
HSD17B7	7906904	-0.129996	0.150697	0.0354153	0.186113
RGS4	7906919	-0.0817232	-0.073041	-0.0932423	-0.166283
NUF2	7906930	1.95294	1.84471	1.15578	3.00049
PBX1	7906954	0.0703719	0.661712	-0.306198	0.355514
LRRC52	7906973	-0.0629819	-0.0351476	-0.144358	-0.179506
MGST3	7906978	0.447119	0.237033	-0.556986	-0.319954
LOC440700	7906988	-0.175567	-0.200892	-0.0704897	-0.271382
UCK2	7906995	0.498491	0.373245	0.265358	0.638603
FMO9P	7907012	0.0564611	-0.0529032	0.00533722	-0.047566
POGK	7907024	0.0608053	0.143102	0.103898	0.247
MAEL	7907032	0.128912	0.0941877	-0.175737	-0.0815495
DUSP27	7907053	-0.116292	-0.0732	-0.0829253	-0.156125
POU2F1	7907058	0.104074	-0.24883	0.353908	0.105078
RCSD1	7907079	-0.191997	-1.05174	-0.494382	-1.54612
LOC100128751	7907090	-0.880982	-1.42774	-0.592068	-2.01981
MPZL1	7907092	0.32271	-0.0265724	0.399845	0.373273
DCAF6	7907104	-0.105983	-0.0269228	0.172786	0.145863
TIPRL	7907124	0.313968	0.445362	0.370697	0.816059
SFT2D2	7907135	0.0766584	0.171699	0.234031	0.40573
TBX19	7907146	-0.160866	-0.477329	-0.211093	-0.688421
ATP1B1	7907160	-0.173314	-0.746542	0.0856459	-0.660896
BLZF1	7907171	0.17375	0.214125	-0.0824143	0.131711
C1orf112	7907183	0.212259	0.0828228	0.537559	0.620381
GORAB	7907213	-0.175066	0.208331	-0.0521063	0.156225
PRRX1	7907222	-0.0517601	0.0276808	-0.107177	-0.0794958
C1orf129	7907232	0.0647973	0.0481858	-0.0506457	-0.00245989
FMO3	7907249	0.0529293	0.0276316	-0.12387	-0.0962384
FMO6P	7907260	-0.13721	-0.0202208	-0.0758124	-0.0960331
FMO2	7907271	-0.09617	-0.0946213	-0.134281	-0.228902
FMO1	7907286	0.879473	0.219124	0.190953	0.410078
FMO4	7907297	-0.306155	-0.806878	0.183921	-0.622957
BAT2L2	7907310	-0.189912	-0.100409	0.16315	0.0627407
METTL13	7907353	0.375459	0.315719	0.470135	0.785854
DNM3	7907370	-1.23946	0.595349	-0.647462	-0.0521132
C1orf105	7907396	-0.060288	0.106827	0.000423638	0.107251
C1orf9	7907404	0.00730244	0.0866108	-0.0334625	0.0531483
FASLG	7907430	-0.309585	-0.133542	-0.103906	-0.237447
PRDX6	7907439	0.405592	0.230467	0.282786	0.513253
KLHL20	7907445	-0.0237736	0.0757567	-0.0546452	0.0211115
DARS2	7907466	0.244933	0.234015	0.423404	0.65742
ZBTB37	7907486	-0.581293	-0.596599	-0.508533	-1.10513
RABGAP1L	7907492	-0.230819	-0.060445	-0.01751	-0.077955
GPR52	7907531	-0.769995	-0.293625	-1.10534	-1.39896
TNN	7907549	-0.0475258	-0.0472536	-0.00650191	-0.0537555
PAPPA2	7907572	-0.193814	-0.162115	-0.124418	-0.286532
FAM5B	7907601	-0.156488	0.0291826	-0.198867	-0.169685
RASAL2	7907611	0.0177657	0.817619	-0.364005	0.453614
C1orf49	7907633	-0.065606	0.0433782	-0.0679974	-0.0246192
C1orf220	7907649	-0.120869	-0.372498	-0.0792665	-0.451765
RALGPS2	7907657	-0.0300952	-0.172154	-0.0137433	-0.185898
FAM20B	7907680	0.416814	0.517495	0.885598	1.40309
TOR3A	7907690	0.305035	0.352277	0.540468	0.892745
SOAT1	7907702	0.176187	0.0819556	0.236609	0.318565
C1orf125	7907719	-0.206789	-0.0634705	-0.146634	-0.210105
TDRD5	7907749	0.0232715	0.00147471	-0.107506	-0.106031
FAM163A	7907769	-0.194056	-0.0892781	-0.0691513	-0.158429
CEP350	7907790	-0.157614	-0.110603	0.0918677	-0.0187352
QSOX1	7907830	0.669813	0.128422	0.123379	0.251801
LHX4	7907849	-0.103645	-0.113078	0.0561794	-0.0568986
XPR1	7907861	-0.164474	0.382762	-0.0328229	0.349939
KIAA1614	7907882	-0.0511747	-0.00994412	-0.0178659	-0.02781
MR1	7907893	-0.198604	-0.335274	-0.388068	-0.723342
IER5	7907904	-0.143632	0.407993	-0.203258	0.204736
LOC100287948	7907907	-0.118185	-0.0958735	-0.0933702	-0.189244
CACNA1E	7907911	0.0105442	-0.070504	-0.0261006	-0.0966046
NCRNA00272	7907972	0.0117805	-0.149053	-0.0817896	-0.230843
NPL	7908003	0.683357	1.1403	0.674176	1.81447
DHX9	7908022	0.472143	0.65211	0.452783	1.10489
LAMC1	7908041	-0.0766342	-0.319176	0.11689	-0.202287
LAMC2	7908072	-0.143376	-0.0450974	-0.246023	-0.29112
SMG7	7908097	0.0904012	0.165422	0.125274	0.290696
RGL1	7908125	0.295534	0.844061	-0.346104	0.497957
TSEN15	7908147	0.371842	0.22917	0.459999	0.689169
C1orf21	7908161	-0.395559	-0.758275	-0.12228	-0.880555
RNF2	7908169	0.0919871	0.0454538	0.161867	0.207321
C1orf26	7908178	-0.270504	-0.372532	0.233735	-0.138797
HMCN1	7908204	-0.0699419	-0.058799	0.0417723	-0.0170267
PRG4	7908312	-0.0938345	-0.0178713	0.00589966	-0.0119716
C1orf27	7908330	-0.450945	-0.0157047	-0.104121	-0.119826
OCLM	7908347	-1.07092	-0.642219	-0.718005	-1.36022
PLA2G4A	7908351	0.23673	0.481419	-0.257365	0.224053
C1orf99	7908371	-0.0227307	-0.166303	-0.00366986	-0.169973
RGS18	7908376	0.758662	1.13475	-0.181266	0.953483
RGS21	7908382	-0.128915	-0.0620193	-0.0773825	-0.139402
RGS1	7908388	-0.485479	1.21371	-0.952239	0.26147
RGS13	7908397	-0.242526	0.17762	-0.51117	-0.333549
RGS2	7908409	-0.167562	-0.47424	-0.241926	-0.716166
TROVE2	7908421	0.0546506	0.353182	0.0990225	0.452204
CDC73	7908437	-0.315623	0.0297005	0.0158883	0.0455888
CFH	7908459	-0.660789	-0.15638	-0.210059	-0.366439
CFHR3	7908481	-0.196345	0.0107457	0.090561	0.101307
CFHR2	7908496	0.010156	0.0398033	0.122763	0.162566
CFHR5	7908499	-0.0589734	-0.124736	0.0296423	-0.0950934
CRB1	7908508	-0.111275	-0.0377758	-0.164125	-0.201901
C1orf53	7908525	0.301439	0.118162	0.302994	0.421156
LHX9	7908529	0.0252429	0.00589352	0.0419739	0.0478675
NEK7	7908543	-0.164913	0.25329	-0.191045	0.0622455
PTPRC	7908553	-0.592142	-1.08452	-0.154931	-1.23945
NR5A2	7908597	-0.0435926	-0.145663	-0.0346009	-0.180264
FAM58B	7908612	-0.202757	-0.183764	-0.150455	-0.334219
CAMSAP1L1	7908614	-0.774244	0.118726	-0.512861	-0.394135
GPR25	7908637	-0.058152	-0.0649455	-0.00193895	-0.0668845
C1orf106	7908639	-0.12365	0.0187542	-0.155516	-0.136762
IGFN1	7908650	0.020134	-0.0403604	0.0392618	-0.0010986
PKP1	7908672	0.011486	0.0203868	-0.0515393	-0.0311526
RPS10P7	7908692	-0.173665	-0.417144	0.269883	-0.147261
NAV1	7908694	-0.40918	-0.852792	-0.215663	-1.06846
IPO9	7908732	0.208646	0.0705918	0.211721	0.282312
SHISA4	7908758	-0.284023	-0.118128	-0.204974	-0.323102
TIMM17A	7908766	0.308838	0.870492	0.0205561	0.891048
RNPEP	7908779	0.379187	0.0854381	0.0151383	0.100576
ELF3	7908793	0.0435279	0.0996757	-0.0728778	0.0267979
GPR37L1	7908812	-0.142295	-0.055662	-0.0596417	-0.115304
LGR6	7908816	0.291096	0.132676	0.127992	0.260668
PPP1R12B	7908841	-0.167978	-0.383006	-0.0577406	-0.440746
OCR1	7908861	-0.920236	-0.836197	-1.16194	-1.99813
LOC641515	7908863	-0.206665	-0.176664	-0.110679	-0.287343
TMEM183A	7908867	0.42155	0.365533	0.215128	0.580661
PPFIA4	7908879	-0.0145024	0.0230041	-0.0558602	-0.0328561
ADORA1	7908907	-0.120502	0.0324445	-0.111588	-0.079144
BTG2	7908917	-0.730305	-0.105879	-0.542042	-0.647922
PRELP	7908924	-0.0873736	-0.0862495	0.0576556	-0.0285939
OPTC	7908931	-0.136359	-0.0873861	-0.032372	-0.119758
ATP2B4	7908940	-0.0878373	-0.776117	-0.0422649	-0.818382
NCRNA00260	7908966	-0.51568	-0.653755	-0.511921	-1.16568
LAX1	7908968	1.21379	0.887651	0.41447	1.30212
SOX13	7908993	-0.100998	-0.141954	-0.325073	-0.467027
MDM4	7909011	-0.400271	-0.426986	-0.340261	-0.767247
NFASC	7909027	-0.163735	-0.0862945	-0.117481	-0.203775
CNTN2	7909064	-0.0540897	-0.0558675	-0.0722785	-0.128146
TMCC2	7909088	-0.0153109	0.804577	-0.0517464	0.752831
CDK18	7909104	-0.0634591	-0.315383	-0.0101483	-0.325532
MFSD4	7909127	-0.292202	-0.305271	-0.214436	-0.519707
LOC284581	7909144	-0.642882	-0.324153	-0.327401	-0.651554
AVPR1B	7909155	-1.41007	-1.57912	-0.669002	-2.24813
CTSE	7909164	-0.21271	-0.13582	0.409606	0.273786
RASSF5	7909214	0.0704425	-0.253556	0.215958	-0.0375985
DYRK3	7909225	0.138835	-0.16962	0.346765	0.177144
MAPKAPK2	7909236	0.256582	0.138143	0.115886	0.254029
IL19	7909250	-0.141094	-0.0250774	-0.0323623	-0.0574397
IL20	7909261	-0.135758	0.0103901	-0.181526	-0.171136
IL24	7909271	-0.368392	0.160976	-0.27698	-0.116004
PFKFB2	7909285	0.207964	0.298554	0.230642	0.529196
C4BPB	7909306	-0.0610635	-0.0535934	-0.194952	-0.248545
C4BPA	7909318	-0.119175	-0.0985752	-0.087543	-0.186118
CD55	7909332	0.276972	0.340407	0.255609	0.596016
CR2	7909350	0.395456	-0.0216679	0.746833	0.725165
CR1	7909371	0.55029	-0.504582	1.07184	0.567262
CR1L	7909390	0.999303	0.764587	0.325179	1.08977
CD46	7909400	-0.234712	-0.226166	0.117333	-0.108833
LOC148696	7909418	-0.157422	-0.18698	-0.13951	-0.326491
LOC642587	7909422	-0.359957	-0.22934	-0.143691	-0.373031
CAMK1G	7909425	-0.0582924	0.0703658	-0.0607689	0.00959692
G0S2	7909441	0.40378	0.272498	0.296993	0.569491
HSD11B1	7909446	-0.0360309	-0.0799336	-0.0513469	-0.131281
TRAF3IP3	7909455	-0.0864075	-1.7185	0.00820313	-1.71029
C1orf107	7909478	0.12064	0.110653	0.333705	0.444357
SYT14	7909494	0.0166811	0.0787569	0.012215	0.0909719
SERTAD4	7909503	-0.0767555	0.0573253	-0.152538	-0.0952127
HHAT	7909510	-0.450316	-0.587818	-0.472628	-1.06045
RCOR3	7909529	0.00598124	-0.210868	0.15949	-0.0513777
TRAF5	7909545	-0.16108	-1.02198	0.133772	-0.888206
C1orf97	7909561	-0.207109	-0.17171	0.297337	0.125627
DTL	7909568	2.60551	2.46749	0.798776	3.26626
PPP2R5A	7909586	-0.292943	-0.225742	0.110584	-0.115158
SNORA16B	7909601	-0.858836	-0.478627	-0.768494	-1.24712
NENF	7909603	0.623213	0.493489	0.22796	0.721448
ATF3	7909610	-0.697344	0.3821	-0.542613	-0.160513
FLVCR1	7909628	-0.0571603	0.186076	-0.201161	-0.0150852
VASH2	7909642	0.230039	0.217567	-0.018518	0.199049
RPS6KC1	7909661	-0.38389	-0.154962	-0.357363	-0.512325
PROX1	7909681	0.0529084	0.0971313	-0.109931	-0.0127993
SMYD2	7909689	0.741345	0.139551	0.483768	0.623318
CENPF	7909708	1.71411	1.4826	1.22164	2.70424
KCNK2	7909730	-0.0846255	-0.0353446	-0.0648175	-0.100162
KCTD3	7909745	-0.119918	0.273776	-0.0760191	0.197757
SPATA17	7909768	0.294679	0.387125	-0.0383837	0.348742
RRP15	7909782	0.414461	0.94596	0.416648	1.36261
TGFB2	7909789	-0.16285	0.280312	-0.12479	0.155522
LYPLAL1	7909801	-0.40535	-0.633644	0.24202	-0.391624
IARS2	7909815	0.243341	0.170341	0.377836	0.548177
MARK1	7909841	-0.0843377	0.0202538	-0.021646	-0.00139228
C1orf115	7909862	-0.167196	-0.128728	-0.106404	-0.235133
MOSC2	7909866	-0.15127	0.122957	-0.621352	-0.498396
MOSC1	7909877	0.85108	0.021368	0.131885	0.153253
HLX	7909890	-0.124575	-0.39487	-0.032618	-0.427488
MIA3	7909898	-0.046295	-0.0280329	0.328584	0.300551
C1orf58	7909931	-0.0338473	0.299954	-0.0549699	0.244984
FAM177B	7909946	0.0348119	0.150218	-0.128188	0.0220301
DISP1	7909954	-0.183742	-0.518106	0.1608	-0.357305
C1orf65	7909965	-0.0982064	-0.113406	-0.0453698	-0.158776
CAPN2	7909967	-0.401968	-0.222298	0.0758666	-0.146431
FBXO28	7909992	-0.244966	0.158016	-0.152991	0.00502534
DEGS1	7910001	0.124738	0.0387344	0.315441	0.354175
CNIH4	7910014	0.0939399	0.524478	-0.077061	0.447417
CNIH3	7910022	-0.0921169	-0.0261295	-0.023739	-0.0498685
EPHX1	7910111	0.080448	0.330095	0.150451	0.480547
MIXL1	7910134	-0.405744	-0.0941957	-0.406542	-0.500738
C1orf95	7910142	-0.0440966	0.247569	-0.281473	-0.0339041
PSEN2	7910146	-0.529228	0.157635	-0.390644	-0.233009
CABC1	7910164	0.377396	0.0239619	0.098886	0.122848
BTF3P9	7910184	0.314231	-0.066053	0.157255	0.0912019
SNAP47	7910200	0.0418891	0.19473	0.107669	0.302399
PRSS38	7910211	0.00998519	0.0476492	-0.0955765	-0.0479273
WNT3A	7910217	-0.0741729	0.0665654	-0.0849029	-0.0183374
ARF1	7910229	0.171643	0.414084	-0.131876	0.282208
GUK1	7910241	0.118313	0.322269	0.0364691	0.358738
GJC2	7910257	0.0206216	-0.0090314	0.0435489	0.0345175
C1orf69	7910261	0.0119561	0.0472641	0.0376999	0.084964
HIST3H2BB	7910369	0.24201	0.106998	0.369163	0.476161
RNF187	7910372	0.269733	0.0397041	0.212399	0.252103
RHOU	7910387	0.729645	1.06668	-0.186244	0.880433
RAB4A	7910398	0.0971886	-0.0338833	0.308464	0.27458
URB2	7910416	0.774739	0.758644	0.696193	1.45484
GALNT2	7910427	0.0135661	0.0311419	-0.110814	-0.0796719
COG2	7910446	0.557455	0.242569	0.556091	0.79866
CAPN9	7910466	0.0266478	-0.0443004	0.0514757	0.00717525
ARV1	7910494	0.489241	0.16083	0.833542	0.994372
TRIM67	7910503	-0.0948042	-0.049548	0.0704227	0.0208747
GNPAT	7910520	0.291823	0.0158949	0.461503	0.477398
C1orf124	7910539	-0.0107492	0.262182	-0.0266888	0.235494
TSNAX	7910550	0.504701	0.623295	0.234195	0.85749
DISC1	7910559	-0.131687	-0.173486	-0.562445	-0.735931
KIAA1383	7910589	-0.011028	-0.432981	0.160661	-0.272319
C1orf57	7910591	0.157326	-0.280434	0.322471	0.0420375
KIAA1804	7910600	0.250544	-0.147212	0.212823	0.0656108
KCNK1	7910611	-0.03503	0.0154106	-0.110519	-0.0951085
SLC35F3	7910618	-0.0236281	-0.0663227	-0.0809435	-0.147266
C1orf31	7910630	0.565616	0.240435	0.446189	0.686623
GGPS1	7910640	0.119293	-0.186219	0.320775	0.134556
TBCE	7910651	0.465582	0.384093	0.420633	0.804725
GPR137B	7910680	-0.444597	-0.460921	-0.313485	-0.774406
EDARADD	7910694	0.0880472	-0.00101293	0.377417	0.376404
ACTN2	7910727	0.0184936	0.07162	-0.0270749	0.044545
MTR	7910752	-0.0447728	0.104657	-0.0759642	0.0286926
RYR2	7910792	-0.109127	0.0433146	-0.0796697	-0.036355
LOC100130331	7910901	0.142923	0.054713	0.243151	0.297864
CHRM3	7910915	-1.20714	-0.997272	-1.07706	-2.07433
FMN2	7910923	-0.0846481	-0.0835296	-0.0462445	-0.129774
KMO	7910950	0.933126	0.0506801	0.0680915	0.118772
WDR64	7910971	-0.0492441	-0.166404	0.0298722	-0.136531
EXO1	7910997	2.16198	2.0354	0.952236	2.98763
SDCCAG8	7911017	-0.301481	-0.577133	-0.612711	-1.18984
ZNF238	7911038	-0.373354	-0.54949	-0.00423387	-0.553724
C1orf100	7911049	-0.12582	-0.0108719	0.0541378	0.043266
C1orf101	7911056	-0.400105	-0.858044	-0.296397	-1.15444
PPPDE1	7911078	0.197335	0.437268	0.0396661	0.476934
KIF26B	7911114	0.0162398	0.0813885	0.04051	0.121898
CNST	7911138	-0.394645	0.127665	-0.537775	-0.41011
SCCPDH	7911155	0.247346	0.0236407	0.138375	0.162016
LOC149134	7911170	-0.351626	-0.772358	-0.474899	-1.24726
VN1R5	7911174	-0.188039	-0.0750851	-0.141269	-0.216354
NLRP3	7911178	-0.116109	-0.140314	-0.927963	-1.06828
OR2W5	7911197	-0.102727	-0.100914	0.0373669	-0.063547
C1orf150	7911199	-0.051203	-0.24257	0.164842	-0.0777281
OR2G2	7911207	-0.861188	-0.817292	-0.793849	-1.61114
OR2G3	7911209	-1.01961	-0.786868	-1.24813	-2.035
OR9H1P	7911215	-0.359876	-0.325177	-0.464104	-0.789281
TRIM58	7911218	-0.194731	-0.17851	0.101745	-0.0767656
OR2T8	7911233	-0.19303	-0.479276	-0.378487	-0.857763
OR2L13	7911237	-0.561189	-1.71435	-0.308518	-2.02287
OR2L8	7911241	-1.55988	-2.16947	-1.44952	-3.61899
OR2AK2	7911243	-1.60564	-1.99571	-1.3272	-3.32291
OR2L2	7911252	-1.57949	-2.01479	-1.58619	-3.60099
OR2L3	7911258	-1.17277	-1.42932	-0.834565	-2.26388
OR2M1P	7911260	-0.978077	-1.64586	-0.627332	-2.2732
OR2M5	7911263	-0.25642	-0.585309	0.0210699	-0.564239
OR2M2	7911265	-0.462786	-0.687241	-0.221376	-0.908617
OR2M3	7911267	-0.478471	-1.52129	-0.242209	-1.7635
OR2M4	7911269	-0.61258	-0.994435	-0.284601	-1.27904
OR14C36	7911271	0.0722502	0.101572	-0.0194321	0.0821399
OR2T4	7911273	-0.432952	-0.247633	-0.306171	-0.553804
OR2T6	7911276	-0.188581	0.0292973	-0.0816044	-0.0523071
OR2T1	7911278	-0.328294	0.139908	-0.510949	-0.371041
OR2T2	7911281	-0.362577	-0.230517	-0.254009	-0.484526
OR2T3	7911283	-0.329362	-0.112139	-0.104783	-0.216922
OR2T5	7911285	-0.26708	-0.108554	-0.271619	-0.380173
OR2G6	7911287	-0.238208	-0.0830152	-0.224154	-0.307169
ZNF672	7911289	0.0270487	-0.133629	0.0696523	-0.0639763
PGBD2	7911301	0.51805	-0.137106	0.658788	0.521682
NCRNA00115	7911351	-0.549826	-0.408117	-0.464373	-0.872489
NOC2L	7911359	0.484977	0.549389	0.193895	0.743284
C1orf170	7911371	0.0227203	-0.0150178	0.00271075	-0.012307
HES4	7911376	0.00422661	-0.060801	0.0537102	-0.00709081
C1orf159	7911383	0.0630605	0.109872	0.0224521	0.132324
TNFRSF18	7911403	-0.0622422	0.134042	-0.247965	-0.113922
TNFRSF4	7911413	-0.333232	-0.0239059	-0.0554054	-0.0793113
SDF4	7911422	0.0822334	0.187871	0.0219782	0.209849
FAM132A	7911435	-0.0820228	0.00435105	-0.0476387	-0.0432877
UBE2J2	7911444	0.0149528	0.146476	0.0587148	0.20519
ACAP3	7911458	-0.00570851	-0.281979	-0.0954453	-0.377424
CPSF3L	7911486	0.0794703	0.0918497	-0.0353029	0.0565468
DVL1	7911506	-0.0635672	-0.109008	0.0392658	-0.0697419
MXRA8	7911529	-0.0247697	0.066421	0.0700885	0.13651
SSU72	7911568	0.107753	0.131848	0.0676448	0.199493
CDK11A	7911578	-0.158512	-0.141815	0.0620145	-0.0798008
SLC35E2B	7911591	-0.153651	-0.635728	0.0260886	-0.609639
NADK	7911600	0.422514	0.232803	0.157729	0.390531
GNB1	7911619	0.0552609	0.141778	-0.0695649	0.0722129
TMEM52	7911634	-0.0654613	0.00862434	-0.213389	-0.204765
C1orf222	7911643	-0.0809845	0.00760527	-0.136423	-0.128818
LOC728690	7911657	-0.0897475	0.0180476	-0.140548	-0.122501
KIAA1751	7911659	0.0738313	-0.00404044	-0.0204051	-0.0244455
C1orf86	7911683	-0.0216934	-0.0923037	0.0164194	-0.0758843
LOC100129534	7911718	-0.218696	-0.254885	0.0109346	-0.243951
PEX10	7911720	0.355885	0.291765	0.114855	0.40662
PANK4	7911730	0.0611721	-0.0319363	0.165714	0.133778
HES5	7911750	-0.00471031	-0.0425595	0.0578844	0.0153249
TNFRSF14	7911754	-0.0335846	0.706426	-0.210918	0.495508
MMEL1	7911767	0.0271493	0.131854	-0.0559851	0.0758689
MEGF6	7911799	-0.0552651	-0.397362	-0.18988	-0.587242
WDR8	7911839	0.0492221	-0.0436204	0.17694	0.13332
KIAA0495	7911854	-0.248313	-0.315187	0.0268314	-0.288355
LRRC47	7911862	0.325486	0.36122	0.462158	0.823378
KIAA0562	7911870	-0.18439	0.349087	-0.044315	0.304772
C1orf174	7911897	0.333915	0.552442	0.0359134	0.588356
NPHP4	7911902	0.0684229	0.108051	-0.0106248	0.0974267
CHD5	7911941	0.233894	0.096158	0.132242	0.2284
RPL22	7911989	0.0924982	-0.283909	0.594597	0.310689
ICMT	7911993	0.596168	0.389129	0.655477	1.04461
GPR153	7912004	0.027858	-0.0868411	0.0982547	0.0114135
HES2	7912031	-0.0324672	-0.0536249	-0.0285277	-0.0821526
TNFRSF25	7912040	0.12074	0.160244	0.193322	0.353566
PLEKHG5	7912056	-0.0333866	0.0590551	-0.0781134	-0.0190583
NOL9	7912086	0.288898	0.285002	0.367243	0.652245
KLHL21	7912102	0.161114	-0.0883947	0.127078	0.0386835
DNAJC11	7912112	0.338471	0.588469	0.208242	0.796711
UTS2	7912136	-0.113522	0.181878	0.494478	0.676356
TNFRSF9	7912145	-0.154014	2.96047	0.550924	3.5114
ERRFI1	7912157	-0.226827	0.0889559	-0.114194	-0.0252383
RERE	7912166	-0.483321	-0.562585	-0.0354675	-0.598052
ENO1	7912198	0.0846979	0.120738	0.0046513	0.125389
SLC2A7	7912211	-0.263137	-0.143626	-0.178521	-0.322147
SLC2A5	7912224	-0.95954	-2.36984	-0.762832	-3.13267
GPR157	7912239	-0.130248	-0.155946	-0.244229	-0.400175
MIR34A	7912250	-0.209454	0.234831	-0.321819	-0.0869883
C1orf200	7912254	-0.0413777	-0.113788	-0.202478	-0.316266
CLSTN1	7912257	-0.119488	-0.473523	0.0861243	-0.387399
FLJ16126	7912280	-0.0790703	-0.16839	-0.175412	-0.343802
CTNNBIP1	7912283	0.0693103	-0.119911	-0.0827324	-0.202643
LZIC	7912292	0.145938	0.363447	0.175196	0.538642
DFFA	7912303	0.272184	0.0452695	0.357633	0.402903
C1orf127	7912349	-0.14071	-0.151213	-0.113466	-0.264679
MASP2	7912361	-0.186784	-0.0348776	-0.188727	-0.223604
SRM	7912374	0.928944	0.707706	0.67871	1.38642
EXOSC10	7912385	0.202656	0.171068	0.363637	0.534705
MTOR	7912412	0.103659	0.297805	0.135381	0.433186
FBXO2	7912473	0.0934594	0.0591483	-0.0145056	0.0446426
MAD2L2	7912481	0.285588	0.178349	0.178321	0.35667
NPPA	7912515	-0.269388	0.054678	-0.222808	-0.16813
NPPB	7912520	-0.198737	-0.0838977	-0.0528544	-0.136752
DHRS3	7912537	0.924397	0.904594	0.779587	1.68418
PRAMEF11	7912547	-0.129825	-0.0110431	-0.17418	-0.185223
HNRNPCL1	7912552	-0.0578513	0.0596011	0.0796628	0.139264
PRAMEF4	7912555	-0.124194	-0.0455024	-0.0959603	-0.141463
LOC440563	7912580	-0.033323	-0.124803	0.0173681	-0.107435
CASP9	7912646	0.214607	0.0384394	0.290069	0.328508
AGMAT	7912659	0.811262	0.913433	0.654031	1.56746
UQCRH	7912670	0.858031	0.736102	0.450635	1.18674
FLJ37453	7912672	-0.218869	-0.0898868	-0.371174	-0.46106
ZBTB17	7912675	0.132201	0.291366	-0.0790968	0.212269
HSPB7	7912692	0.0206298	-0.0429489	-0.0284634	-0.0714123
FAM131C	7912701	-0.0427059	0.0170352	-0.0634747	-0.0464395
EPHA2	7912706	0.0351241	0.147381	0.0022332	0.149614
ARHGEF19	7912724	0.091157	-0.0814408	-0.00576945	-0.0872102
C1orf89	7912743	-0.190982	-0.0162639	-0.109835	-0.126099
FBXO42	7912750	-0.00140258	0.0736901	-0.20076	-0.127069
SPATA21	7912764	-0.189314	-0.0644957	-0.0390002	-0.103496
CROCCP3	7912784	0.0492745	-0.261736	0.0371084	-0.224627
CROCCP2	7912839	-0.0759765	-0.145035	0.00185173	-0.143184
ESPNP	7912854	-0.25455	-0.138177	-0.0936812	-0.231858
MST1P9	7912863	-0.0998388	-0.27084	-0.109213	-0.380053
MFAP2	7912887	-0.691394	-1.012	-0.441901	-1.4539
ATP13A2	7912898	-0.0932333	0.497573	-0.0860645	0.411509
SDHB	7912928	0.746385	0.624746	0.185363	0.810109
PADI2	7912937	0.626684	0.0442046	-0.122935	-0.0787308
RCC2	7912956	0.23579	0.290959	0.127894	0.418853
TAS1R2	7912968	-0.082311	0.0243536	-0.0844127	-0.0600591
ALDH4A1	7912975	0.379736	0.335437	0.405868	0.741305
IFFO2	7912994	-0.134128	0.0231209	0.14973	0.172851
UBR4	7913001	-0.0828448	0.215959	-0.0886163	0.127343
KIAA0090	7913110	0.335629	0.54664	0.0515622	0.598202
AKR7L	7913138	0.174574	-0.0896556	-0.072879	-0.162535
AKR7A3	7913146	0.0546079	-0.18536	-0.0977764	-0.283137
AKR7A2	7913156	0.224808	-0.309321	0.0584879	-0.250833
CAPZB	7913169	-0.103552	0.0587861	-0.193214	-0.134428
TMCO4	7913187	-0.247759	-0.373461	0.0116358	-0.361825
RNF186	7913206	0.0313755	-0.0258863	-0.040212	-0.0660982
PLA2G2E	7913211	-0.176456	0.00258953	-0.143332	-0.140742
PLA2G2A	7913216	-0.248672	-0.13348	-0.16138	-0.294859
PLA2G2D	7913226	-0.108788	-0.118421	-0.114098	-0.232518
PLA2G2C	7913235	-0.167813	-0.0407843	-0.0869495	-0.127734
CAMK2N1	7913237	0.0806569	0.195734	-0.0105248	0.185209
MUL1	7913242	0.12347	0.417872	0.105328	0.5232
DDOST	7913256	0.257952	0.254171	0.0568337	0.311005
KIF17	7913271	0.130823	0.030593	-0.0476557	-0.0170627
SH2D5	7913290	-0.177123	-0.0814589	-0.0483108	-0.12977
HP1BP3	7913300	0.054727	-0.156989	0.164605	0.00761631
EIF4G3	7913319	-0.106642	0.0649306	-0.141204	-0.0762738
ECE1	7913357	-0.0159109	1.75505	0.279628	2.03468
RAP1GAP	7913385	0.143639	0.14666	0.205505	0.352165
USP48	7913415	-0.0314575	0.0560799	-0.0204558	0.0356241
HSPG2	7913450	0.374305	0.0163017	0.279608	0.29591
WNT4	7913547	-0.00265781	-0.0164688	-0.0277882	-0.0442571
LUZP1	7913558	-0.166236	-0.0849659	-0.0334221	-0.118388
HTR1D	7913566	-0.088469	-0.067383	-0.200482	-0.267865
HNRNPR	7913571	0.137097	0.302346	0.34056	0.642905
ZNF436	7913582	-0.0992052	-0.186905	0.0412529	-0.145652
TCEA3	7913593	0.418357	0.197476	0.00594996	0.203426
ASAP3	7913609	-0.109869	-0.00174091	-0.111355	-0.113096
E2F2	7913644	0.545609	0.554631	0.237653	0.792284
ID3	7913655	-0.703856	0.0571701	-0.738365	-0.681195
GALE	7913667	0.481432	0.321072	0.363827	0.684899
HMGCL	7913682	0.30887	0.152145	0.19975	0.351894
FUCA1	7913694	-0.00837399	-0.685442	0.388212	-0.29723
CNR2	7913705	0.0462702	-1.26044	0.0227881	-1.23765
MYOM3	7913727	0.0332178	0.00529119	-0.0752397	-0.0699485
IL22RA1	7913768	-0.0266589	-0.0880525	-0.0686263	-0.156679
IL28RA	7913776	-0.114464	-0.142179	-0.0420422	-0.184221
C1orf201	7913787	0.197943	0.0802708	0.416481	0.496752
RUNX3	7913805	0.164577	-0.246036	0.0124389	-0.233597
SYF2	7913814	-0.177829	-0.154831	-0.0766177	-0.231449
C1orf63	7913824	-0.698446	-0.772044	-0.585651	-1.3577
RHCE	7913835	0.0880114	0.263383	0.141983	0.405366
C1orf135	7913852	1.04642	1.22117	0.61817	1.83934
PAQR7	7913858	-0.0459458	-0.31274	0.0909431	-0.221797
PAFAH2	7913883	-0.169545	-0.285682	-0.204757	-0.490439
SLC30A2	7913896	-0.076489	-0.145733	-0.139698	-0.285431
TRIM63	7913907	0.0593673	0.000937521	0.0745917	0.0755292
UBXN11	7913918	0.171728	-0.0363608	0.0975395	0.0611787
AIM1L	7913938	-0.10852	-0.170386	-0.0464405	-0.216827
ZNF683	7913965	-0.125361	-0.0912745	-0.0759897	-0.167264
GPN2	7913978	0.167222	0.275646	0.0240485	0.299694
GPATCH3	7913990	-0.0161401	0.127934	-0.198455	-0.0705202
NR0B2	7914000	-0.110543	-0.110762	-0.108835	-0.219598
C1orf172	7914003	-0.0575636	-0.0443366	-0.074822	-0.119159
FAM46B	7914015	-0.117141	-0.057485	-0.0871178	-0.144603
SLC9A1	7914021	0.0438439	0.258615	-0.0105454	0.24807
MAP3K6	7914042	-0.279779	-0.341716	-0.255439	-0.597155
FCN3	7914075	-0.0846025	-0.0355928	-0.231261	-0.266853
CD164L2	7914084	-0.0805061	0.0161775	-0.11841	-0.102233
WASF2	7914094	-0.0888266	-0.290257	0.164679	-0.125578
AHDC1	7914103	-0.293658	-0.105402	-0.0235954	-0.128997
FGR	7914112	0.125943	1.06791	-0.417706	0.650205
IFI6	7914127	0.155535	0.603339	0.471261	1.0746
RPA2	7914141	0.49369	0.487224	0.507528	0.994752
EYA3	7914153	0.0197083	0.244469	0.241469	0.485938
PTAFR	7914184	-0.130298	0.573196	-0.413665	0.159531
SNHG12	7914202	0.0625099	0.224937	-0.286733	-0.0617964
SNORA61	7914212	-0.156819	0.154247	-0.100082	0.0541646
SNORA44	7914214	-0.156851	0.0802233	-0.140726	-0.0605024
SNORA16A	7914216	0.0324263	0.33859	0.431594	0.770184
TAF12	7914218	0.279932	-0.00931009	0.230662	0.221352
TMEM200B	7914232	-0.0300746	-0.0260009	-0.0267351	-0.052736
SRSF4	7914235	0.119747	0.479044	-0.178854	0.300191
MECR	7914245	0.311532	0.231151	0.110494	0.341644
LAPTM5	7914270	-0.0492723	0.0637266	0.0772035	0.14093
SDC3	7914282	-0.0670836	-0.00113775	0.0505968	0.049459
PUM1	7914296	-0.0703448	0.0413011	-0.0844312	-0.0431301
NKAIN1	7914326	-0.17977	-0.00267738	-0.0451555	-0.0478329
SNRNP40	7914334	0.554295	0.616143	0.31924	0.935382
FABP3	7914342	0.116234	0.435032	-0.20821	0.226822
PEF1	7914354	0.243326	0.26226	0.178788	0.441048
COL16A1	7914361	-0.0981341	-0.103028	-0.143618	-0.246646
BAI2	7914433	-0.0839804	-0.0486643	-0.189671	-0.238335
SPOCD1	7914467	-0.197628	-0.141223	-0.0973928	-0.238615
PTP4A2	7914489	0.0514812	0.286866	0.0530433	0.339909
C1orf91	7914500	-0.456864	-0.391909	-0.291373	-0.683282
MTMR9L	7914516	-0.440379	-0.197184	-0.342045	-0.539229
MARCKSL1	7914525	0.0895524	0.200909	0.10156	0.302469
BSDC1	7914530	0.0269283	0.108738	0.166491	0.27523
ZBTB8OS	7914550	0.196654	0.138745	0.474011	0.612757
SYNC	7914557	-0.0877089	0.020507	-0.0189963	0.00151067
YARS	7914563	0.600664	1.07688	0.049277	1.12616
FNDC5	7914580	-0.140324	-0.0431549	-0.0423351	-0.08549
TMEM54	7914592	-0.0806218	0.0636293	-0.00258709	0.0610422
RNF19B	7914603	-0.448983	0.482828	-0.518443	-0.0356146
TRIM62	7914630	-0.116381	-0.108487	-0.0508573	-0.159345
A3GALT2	7914643	-0.265326	0.0238315	-0.241232	-0.217401
PHC2	7914648	0.0872658	-0.095382	0.0185055	-0.0768764
CSMD2	7914667	-0.124872	-0.080369	-0.0967624	-0.177131
C1orf212	7914750	0.0335233	-0.0180362	0.28098	0.262944
DLGAP3	7914758	0.0995417	0.179969	-0.134456	0.0455129
ZMYM6	7914764	-0.307222	-0.414624	-0.16927	-0.583893
SFPQ	7914791	-0.175763	0.133974	0.0833846	0.217359
KIAA0319L	7914809	0.0252686	-0.11088	0.0586468	-0.0522331
PSMB2	7914834	0.440084	0.670189	0.330577	1.00077
C1orf216	7914847	0.181489	0.0162383	-0.0188287	-0.0025904
COL8A2	7914880	-0.0107951	-0.0548432	0.0223502	-0.032493
TRAPPC3	7914887	0.267025	0.122103	0.126973	0.249076
STK40	7914904	-0.11236	0.17824	-0.0609803	0.11726
LSM10	7914917	0.355997	0.247221	0.425725	0.672946
OSCP1	7914923	-0.0371297	-0.0554523	-0.0470961	-0.102548
MRPS15	7914940	0.958543	0.881676	0.610162	1.49184
CSF3R	7914950	0.853027	-1.18124	-0.716592	-1.89783
GRIK3	7914974	-0.0438799	-0.00886482	0.0172571	0.00839228
MEAF6	7914996	0.0142542	-0.0847413	0.0833367	-0.00140456
SNIP1	7915008	-0.00199105	0.0807469	0.178762	0.259509
GNL2	7915015	0.314448	0.702003	0.177724	0.879727
RSPO1	7915032	-0.0108376	-0.0965809	-0.0443625	-0.140943
C1orf109	7915045	0.358697	0.474689	0.358059	0.832747
YRDC	7915084	0.28079	0.892188	0.0663498	0.958537
MTF1	7915091	0.168413	-0.055852	0.526145	0.470293
INPP5B	7915101	-0.172775	-0.193391	0.0213492	-0.172042
SF3A3	7915130	0.271639	0.332791	0.0675849	0.400376
FHL3	7915147	0.059624	0.254223	-0.121514	0.132709
POU3F1	7915156	-0.00788583	-0.00484358	0.0672308	0.0623872
RRAGC	7915160	0.084672	0.143559	-0.0738782	0.069681
MYCBP	7915170	0.321671	0.269948	0.44806	0.718008
GJA9	7915178	-0.0503351	-0.144425	0.0557822	-0.0886432
RHBDL2	7915184	-0.0143074	-0.146021	0.0274535	-0.118567
PPIEL	7915204	-0.190412	-0.317824	-0.126404	-0.444228
PABPC4	7915207	0.485023	0.299338	0.532394	0.831732
SNORA55	7915227	-0.255843	0.171312	-0.00365924	0.167653
HEYL	7915229	-0.335707	-0.193183	-0.119334	-0.312516
NT5C1A	7915238	-0.224297	-0.0758027	-0.0184459	-0.0942486
HPCAL4	7915245	0.06265	-0.0610096	0.083556	0.0225464
TRIT1	7915261	0.0779069	0.40996	-0.123567	0.286392
MYCL1	7915277	0.102212	0.0892724	0.0142139	0.103486
PPT1	7915286	0.306744	0.00929061	0.0437573	0.0530479
COL9A2	7915297	0.117904	0.151334	0.0180118	0.169346
RIMS3	7915333	0.0433009	0.112237	0.0354827	0.14772
CITED4	7915347	0.14213	0.164288	-0.0151791	0.149109
SLFNL1	7915351	-0.252658	-0.207232	-0.068227	-0.275459
SCMH1	7915363	-0.177182	-0.463076	-0.219339	-0.682414
EDN2	7915385	-0.121091	0.00588281	-0.0357805	-0.0298977
HIVEP3	7915392	0.0479078	0.458415	-0.379226	0.0791886
GUCA2A	7915404	-0.0863332	-0.0872577	-0.218246	-0.305504
FOXJ3	7915408	-0.137545	-0.368714	0.0637089	-0.305005
ZMYND12	7915425	-0.0129131	-0.431665	-0.100558	-0.532223
CLDN19	7915435	-0.222096	-0.0240124	-0.269279	-0.293291
LEPRE1	7915444	0.148897	-0.0676689	0.0522843	-0.0153847
CCDC23	7915468	0.752572	-0.638486	0.687513	0.0490271
SLC2A1	7915472	0.840541	1.23614	0.172277	1.40842
EBNA1BP2	7915485	0.594916	0.661774	0.489768	1.15154
LOC100131756	7915498	-0.566625	-0.583074	-0.218701	-0.801775
C1orf210	7915500	-0.209881	-0.184266	-0.068657	-0.252923
ELOVL1	7915504	0.459228	0.742662	0.00661979	0.749281
MED8	7915516	0.331514	0.147654	0.393921	0.541575
HYI	7915529	0.185286	-0.264345	0.33774	0.0733947
SLC6A9	7915543	0.129796	0.455997	0.325504	0.781501
ERI3	7915567	0.14091	0.154962	0.212917	0.367879
TMEM53	7915578	0.330726	-0.0413103	0.525059	0.483749
RNU5F	7915590	0.520842	1.14801	-0.0377292	1.11028
BEST4	7915598	-0.0612706	-0.00653962	-0.055291	-0.0618306
TCTEX1D4	7915609	-0.156853	-0.1115	-0.0416127	-0.153113
PTCH2	7915614	-0.177735	0.00186704	-0.272209	-0.270342
EIF2B3	7915640	0.29191	0.529591	-0.098334	0.431257
HECTD3	7915659	-0.017041	-0.0179119	0.0854699	0.067558
ZSWIM5	7915682	-0.375622	-0.388867	-0.0979541	-0.486821
MUTYH	7915695	0.092114	0.153949	-0.0245074	0.129442
TESK2	7915718	-0.148486	-0.102328	-0.312732	-0.41506
PRDX1	7915733	0.148874	0.607663	-0.112127	0.495536
CCDC17	7915743	-0.265787	-0.0624313	-0.408528	-0.470959
GPBP1L1	7915758	-0.192097	-0.162285	0.0339842	-0.128301
IPP	7915775	0.26673	0.476624	0.464766	0.94139
PIK3R3	7915787	1.17669	0.198348	0.717925	0.916273
POMGNT1	7915801	0.134938	0.094207	0.120224	0.214431
LRRC41	7915827	0.359654	0.230466	0.296225	0.52669
KNCN	7915841	-0.284183	-0.112924	-0.209566	-0.322489
MKNK1	7915846	0.196357	0.351831	-0.0728689	0.278962
MOBKL2C	7915861	-0.106254	0.615135	-0.236294	0.378841
ATPAF1	7915870	0.238608	0.0629431	0.398002	0.460945
KIAA0494	7915882	-0.334356	-0.617318	0.261533	-0.355786
CYP4Z2P	7915896	0.0442778	0.180366	0.417645	0.598011
CYP4A11	7915902	-0.24304	-0.140456	-0.34483	-0.485286
PDZK1IP1	7915910	-0.299825	-0.0959296	-0.138769	-0.234699
TAL1	7915919	0.312978	0.612656	0.285535	0.898191
STIL	7915926	1.71525	1.64894	1.08965	2.73859
LOC388630	7915949	-0.176969	-0.191724	-0.126784	-0.318508
LOC100128922	7915951	-0.1729	-0.106111	-0.0811251	-0.187236
SPATA6	7915955	-0.284861	-0.895544	-0.174005	-1.06955
AGBL4	7915971	-0.203359	-0.11018	-0.209434	-0.319614
BEND5	7915982	-0.0254356	-0.425648	0.0105507	-0.415097
DMRTA2	7915991	0.0816585	-0.0940183	0.0596956	-0.0343227
FAF1	7915995	0.290443	0.340841	0.15547	0.496311
TTC39A	7916024	-1.22617	-0.404691	-0.290279	-0.69497
EPS15	7916045	-0.0561204	-0.00727623	0.0725161	0.0652399
NRD1	7916077	0.122546	0.141693	-0.0650188	0.0766743
RAB3B	7916112	-0.13357	0.0853087	0.0192644	0.104573
TXNDC12	7916120	0.310187	0.0158985	0.43856	0.454459
KTI12	7916130	0.253706	0.231189	0.18453	0.415719
CC2D1B	7916135	-0.0975212	-0.249072	-0.0305567	-0.279629
ORC1L	7916167	1.86157	1.6916	0.760397	2.45199
ZCCHC11	7916185	-0.196093	-0.407686	0.00803496	-0.399651
C1orf163	7916219	0.575666	0.640052	0.487457	1.12751
ECHDC2	7916229	-0.529022	-0.765058	-0.426066	-1.19112
SLC1A7	7916248	-0.101501	-0.0761592	0.049175	-0.0269841
C1orf123	7916262	0.241983	-0.164855	-0.0136569	-0.178512
MAGOH	7916274	0.15141	0.240715	0.320786	0.561501
LRP8	7916282	0.297039	0.439109	0.0342354	0.473344
GLIS1	7916304	-0.045268	-0.129794	0.0733495	-0.0564447
TMEM48	7916316	0.783062	0.321955	0.898864	1.22082
YIPF1	7916343	0.169664	-0.0345452	0.104953	0.0704078
HSPB11	7916356	0.443083	0.309012	0.556561	0.865573
LDLRAD1	7916364	0.0384384	-0.0063851	-0.109434	-0.115819
TMEM59	7916372	0.0203578	-0.0157204	-0.0234549	-0.0391753
CDCP2	7916384	-0.00265307	-0.0342079	-0.209647	-0.243854
CYB5RL	7916393	-0.0221556	-0.201766	0.179728	-0.022038
SSBP3	7916403	-0.126028	-0.500431	0.305201	-0.195231
PARS2	7916422	0.0235363	-0.0634285	0.150835	0.0874066
TTC22	7916425	-0.272787	-0.353979	-0.196448	-0.550428
DHCR24	7916432	0.977197	1.8278	0.207329	2.03513
USP24	7916443	-0.394752	-0.167254	-0.200163	-0.367417
PPAP2B	7916493	-0.239816	1.08138	-0.730687	0.350691
C1orf168	7916506	-0.043105	-0.0213836	0.0108561	-0.0105275
C8B	7916526	-0.192719	-0.111398	-0.125806	-0.237204
OMA1	7916570	-0.0559904	-0.715784	0.103331	-0.612452
TACSTD2	7916584	-0.109092	-0.117524	0.0501491	-0.0673748
MYSM1	7916592	-0.380575	-0.262588	-0.0764677	-0.339056
JUN	7916609	-1.06858	1.02185	-0.704974	0.316876
CYP2J2	7916616	-0.16889	-0.379727	0.0101874	-0.36954
C1orf87	7916629	-0.168878	-0.0754195	-0.146484	-0.221904
TM2D1	7916643	-0.222006	-0.233208	0.0578746	-0.175333
KANK4	7916654	0.0373706	-0.0797456	0.0193842	-0.0603614
DOCK7	7916669	-0.0488423	0.331875	-0.12562	0.206255
ITGB3BP	7916727	0.168353	-0.100367	0.536566	0.436199
JAK1	7916747	-0.228645	-0.13872	-0.0235633	-0.162284
INSL5	7916785	-0.177594	-0.0338252	-0.121035	-0.15486
WDR78	7916789	-0.339581	-0.325976	-0.100996	-0.426972
SLC35D1	7916808	-0.0758463	0.166029	-0.221619	-0.0555901
C1orf141	7916822	0.294269	-0.0483699	0.371085	0.322715
SERBP1	7916836	0.431785	0.166921	0.759347	0.926268
GNG12	7916843	-0.536362	0.31272	-0.467721	-0.155001
DIRAS3	7916853	-0.206999	-0.0392465	-0.211435	-0.250681
WLS	7916862	-0.150144	-0.0743159	0.236732	0.162416
RPE65	7916882	-0.11798	-0.0215054	-0.103011	-0.124517
DEPDC1	7916898	1.48621	1.37741	1.59651	2.97392
LRRC40	7916910	0.308871	0.399961	0.358871	0.758832
ANKRD13C	7916928	-0.246902	0.152411	0.103695	0.256106
PTGER3	7916944	0.0870791	0.497138	-0.000382311	0.496756
ZRANB2	7916969	-0.438306	-0.373188	0.04536	-0.327828
NEGR1	7916986	0.145654	-2.08779	-0.104826	-2.19261
C1orf173	7917019	-0.130409	-0.116993	-0.0854558	-0.202449
CRYZ	7917037	0.16661	-0.661242	0.440078	-0.221164
SLC44A5	7917052	-0.172683	0.0121997	-0.243522	-0.231322
ASB17	7917082	-0.05055	-0.0591984	-0.00320817	-0.0624066
PIGK	7917088	0.401547	-0.087284	0.635405	0.548121
ZZZ3	7917103	-0.0110881	0.0612888	-0.0239933	0.0372955
USP33	7917120	-0.240037	0.190973	-0.154374	0.0365996
FUBP1	7917156	-0.115065	-0.0583735	0.119348	0.0609742
ELTD1	7917182	0.00501615	-0.0107291	0.0281627	0.0174336
TTLL7	7917199	-0.546357	-0.453227	-0.247011	-0.700238
CTBS	7917240	0.0978606	0.0108146	0.0162018	0.0270163
C1orf180	7917251	-0.0423288	0.244749	-0.193867	0.0508825
SSX2IP	7917255	0.637368	1.21594	0.238172	1.45411
LPAR3	7917276	-0.0272761	0.082549	-0.232795	-0.150246
MCOLN2	7917283	-0.317202	-0.161594	-0.483705	-0.645299
MCOLN3	7917304	-0.93971	-1.04086	-0.15213	-1.19299
SYDE2	7917322	-0.0449705	-0.687179	-0.00569841	-0.692878
C1orf52	7917331	-0.17329	0.133033	-0.109008	0.0240249
BCL10	7917338	0.116664	0.122266	0.178126	0.300392
DDAH1	7917347	1.14661	1.23599	0.246028	1.48202
ZNHIT6	7917359	0.235213	0.327975	0.417904	0.745878
COL24A1	7917370	-0.652974	-1.3064	-1.11347	-2.41987
ODF2L	7917433	-0.331659	-0.408964	0.000368505	-0.408596
SEPT15	7917455	0.193522	0.192843	0.327831	0.520674
GTF2B	7917472	0.343821	0.571727	-0.0656942	0.506033
CCBL2	7917482	0.352507	0.308435	0.160796	0.469231
GBP3	7917503	-0.411598	-0.620374	0.0913565	-0.529018
GBP1	7917516	-0.359388	0.0167597	0.383908	0.400667
GBP2	7917532	-0.717691	-0.779429	-0.660871	-1.4403
GBP7	7917548	-0.248666	-0.00657926	0.08572	0.0791407
GBP4	7917561	-0.511291	0.0373014	0.214646	0.251947
GBP5	7917576	-0.5243	0.6844	-0.467099	0.217301
GEMIN8P4	7917593	0.0557012	-0.0243527	0.148613	0.12426
BARHL2	7917599	-0.0648465	-0.0662343	-0.124429	-0.190663
ZNF644	7917604	-0.00919542	0.106187	-0.0547038	0.0514828
TGFBR3	7917649	-0.196224	0.0413879	-0.00806604	0.0333219
GLMN	7917676	-0.216096	-0.308322	-0.231979	-0.540301
GFI1	7917697	-0.0244084	-0.883107	-0.457153	-1.34026
EVI5	7917707	0.0214694	0.285134	0.183427	0.468562
FAM69A	7917728	0.0102359	0.176324	0.276999	0.453323
TMED5	7917741	-0.106104	0.166702	-0.0865835	0.0801188
BCAR3	7917754	-0.119509	-0.0281116	-0.0860735	-0.114185
DNTTIP2	7917771	0.146414	0.391039	0.478966	0.870005
GCLM	7917779	0.255662	0.709489	0.44726	1.15675
ABCA4	7917798	0.011951	-0.0328866	-0.00872875	-0.0416153
ARHGAP29	7917850	-0.303343	-0.0203115	-0.143388	-0.1637
F3	7917875	0.164856	0.0989186	0.107557	0.206475
CNN3	7917885	-0.218482	-0.0592872	-0.0961566	-0.155444
ALG14	7917896	0.595232	0.348736	0.660154	1.00889
DPYD	7917912	-0.438375	-1.03833	-0.584286	-1.62262
FLJ35409	7917942	-0.136412	-0.0541354	-0.0768888	-0.131024
LPPR5	7917946	-0.158258	-0.0295995	0.0507315	0.0211319
FRRS1	7917954	1.0333	1.70596	0.509672	2.21563
SASS6	7917976	0.936283	0.472217	1.04299	1.5152
LRRC39	7917996	-0.134636	0.0517396	-0.188483	-0.136744
DBT	7918008	-0.194328	-0.166617	-0.103569	-0.270186
EXTL2	7918026	0.177082	0.0245024	0.427968	0.45247
DPH5	7918034	0.0687266	-0.630001	0.381341	-0.248661
OLFM3	7918052	0.223852	-0.0562218	-0.0236332	-0.079855
COL11A1	7918064	-0.152066	-0.105791	-0.115299	-0.22109
VAV3	7918157	-0.352052	-0.314743	-0.154456	-0.469199
SLC25A24	7918188	-0.116556	0.0303894	-0.0341091	-0.00371965
C1orf59	7918223	0.176272	-0.79912	0.0833901	-0.715729
AKNAD1	7918235	0.0223434	-0.187038	-0.000639768	-0.187678
CLCC1	7918255	-0.264558	-0.0361305	-0.128466	-0.164596
WDR47	7918275	0.015277	0.0740249	0.102759	0.176784
TAF13	7918284	0.177359	0.597008	0.185302	0.78231
C1orf194	7918294	-0.150284	0.0866343	-0.0504573	0.036177
PSRC1	7918300	0.144284	0.322273	-0.139896	0.182377
MYBPHL	7918313	-0.138693	0.0402286	-0.0873634	-0.0471348
SORT1	7918323	-0.337774	0.499701	-0.368686	0.131014
PSMA5	7918345	0.332716	0.552766	0.298265	0.851031
AMIGO1	7918359	-0.240175	-0.105583	-0.0573942	-0.162977
GNAT2	7918367	0.0572043	-0.0237878	-0.0791449	-0.102933
GSTM3	7918379	-0.149549	-0.177851	0.498732	0.320881
EPS8L3	7918394	-0.168196	-0.140885	-0.0206479	-0.161533
ALX3	7918416	-0.124244	-0.00370432	-0.111509	-0.115214
SLC16A4	7918426	-0.307263	-0.0896999	-0.232792	-0.322492
HBXIP	7918437	0.347254	0.298782	-0.0990495	0.199732
KCNA10	7918444	-0.246489	-0.0749052	-0.328259	-0.403164
KCNA2	7918449	0.10213	-0.0480855	0.145708	0.0976228
KCNA3	7918457	0.125077	-0.323282	-0.517174	-0.840456
C1orf103	7918467	0.225457	-0.157771	0.530752	0.372981
DRAM2	7918474	0.262452	-0.0465374	0.184108	0.13757
DENND2D	7918487	-0.267168	0.137898	0.137284	0.275182
OVGP1	7918504	-0.471479	-0.251	-0.461451	-0.71245
WDR77	7918517	0.245021	0.406598	0.102277	0.508874
ADORA3	7918533	-0.0841686	-0.105526	-0.433712	-0.539238
C1orf183	7918552	0.138509	0.120968	0.190754	0.311722
KCND3	7918558	-0.105809	-0.00528429	-0.0142904	-0.0195747
ST7L	7918569	-0.324187	-0.0218941	-0.0730956	-0.0949896
RHOC	7918593	-0.243798	0.443357	-0.3052	0.138156
PPM1J	7918606	-0.122711	0.126591	-0.0248556	0.101736
FLJ36116	7918620	-0.178583	0.00911678	-0.0725823	-0.0634655
SLC16A1	7918622	0.855977	1.05272	0.402688	1.4554
PHTF1	7918634	-0.443388	-0.137043	-0.336862	-0.473905
PTPN22	7918657	0.649321	-0.0625722	0.634467	0.571894
RSBN1	7918681	-0.353374	-0.435973	0.0427372	-0.393236
BCL2L15	7918694	-0.222267	-0.126298	-0.13673	-0.263029
AP4B1	7918703	-0.130099	-0.143874	-0.211478	-0.355352
SYT6	7918716	0.0210683	0.0951368	-0.137386	-0.0422488
TRIM33	7918725	0.113545	0.128956	0.358035	0.486991
BCAS2	7918759	0.188399	0.309064	0.410344	0.719409
AMPD1	7918794	-0.0598364	0.174289	-0.0892464	0.0850424
NRAS	7918813	0.193581	0.259974	0.278701	0.538675
CSDE1	7918825	0.00700513	0.0144011	-0.00962116	0.00477993
SIKE1	7918847	0.342848	0.0354218	0.716662	0.752084
TSPAN2	7918857	0.136881	-0.132432	-0.413071	-0.545503
NGF	7918869	0.0870097	-0.0848057	-0.0114584	-0.0962641
CASQ2	7918878	-0.123785	0.0441982	0.0189861	0.0631843
NHLH2	7918891	0.0498629	-0.0294833	0.0420733	0.01259
CD58	7918902	-0.0557665	-0.149885	0.254334	0.104449
IGSF3	7918913	0.184975	0.296462	0.417339	0.7138
TRIM45	7918925	-0.0593079	-0.233515	-0.0743383	-0.307853
VTCN1	7918936	-0.232711	-0.139532	0.0988713	-0.0406608
GDAP2	7918955	-0.201294	-0.147479	-0.148792	-0.296271
SPAG17	7918973	-0.354024	-0.549428	0.0525528	-0.496875
TBX15	7919028	-0.163513	-0.0383859	-0.115496	-0.153881
WARS2	7919038	0.21244	0.349655	0.143637	0.493293
ZNF697	7919051	-0.16737	-0.135801	0.0312576	-0.104543
HMGCS2	7919055	-0.0529317	-0.0757604	0.0150226	-0.0607378
REG4	7919067	-0.0218074	-0.0986971	-0.0855218	-0.184219
NBPF7	7919080	0.0944726	0.030922	0.00839304	0.039315
ADAM30	7919088	-0.142912	5.62977e-05	-0.12201	-0.121954
NOTCH2	7919095	-0.121169	-0.192076	0.0619217	-0.130155
FCGR1B	7919133	0.875421	0.125468	-0.00510902	0.120359
LOC375010	7919139	-0.402763	-0.070767	0.0982297	0.0274627
NUDT4P1	7919193	0.0689289	0.299092	0.248817	0.547909
POLR3GL	7919197	0.207508	-0.105932	0.228294	0.122362
GNRHR2	7919208	-0.0831721	-0.26619	0.163642	-0.102548
NUDT17	7919217	-0.0044352	-0.104672	-0.267255	-0.371928
POLR3C	7919226	0.240593	0.354072	0.125851	0.479923
CD160	7919243	-0.0710022	0.0338331	-0.174778	-0.140945
PRKAB2	7919305	-0.186775	-0.427816	0.0253887	-0.402427
FMO5	7919314	-0.225602	-0.771473	-0.0776147	-0.849088
ACP6	7919326	-0.100843	-0.617634	0.0939534	-0.52368
GJA5	7919340	0.187525	0.758087	0.555606	1.31369
LOC728855	7919394	-0.271661	-0.0147672	-0.249461	-0.264228
PPIAL4A	7919436	0.355547	0.378603	0.00717002	0.385773
LOC100133075	7919582	0.223527	0.0932716	0.204026	0.297297
HIST2H2AB	7919642	1.06783	0.841556	0.817654	1.65921
SV2A	7919645	-0.123584	0.0500856	-0.373167	-0.323082
SF3B4	7919659	0.230042	0.334706	0.227819	0.562525
MTMR11	7919669	-0.158471	-0.04454	-0.0986271	-0.143167
OTUD7B	7919699	-0.0200385	0.22389	0.31783	0.54172
ANP32E	7919715	0.433788	0.554906	0.490489	1.04539
APH1A	7919729	0.0703734	0.161406	-0.138663	0.0227431
MCL1	7919751	-0.317735	0.0762322	-0.283576	-0.207344
GOLPH3L	7919780	0.0437719	-0.0785407	0.467994	0.389454
HORMAD1	7919787	-0.126849	-0.41789	-0.11596	-0.53385
CTSS	7919800	-0.244707	-0.937102	0.143656	-0.793445
CTSK	7919815	-0.352109	0.0702826	-0.664166	-0.593884
ARNT	7919825	-0.0565748	-0.107157	-4.64475e-06	-0.107161
LASS2	7919856	0.362623	0.48037	0.067976	0.548346
FAM63A	7919872	-0.219986	-0.31407	-0.129175	-0.443245
CDC42SE1	7919888	-0.0724465	0.409361	-0.287052	0.12231
SEMA6C	7919898	-0.207128	-3.23497e-05	0.0859834	0.0859511
LYSMD1	7919923	0.0598499	-0.0566419	0.056168	-0.000473975
TMOD4	7919929	-0.0363679	-0.438831	0.102028	-0.336804
VPS72	7919940	0.242059	0.0762098	0.2401	0.31631
PI4KB	7919950	0.0197988	0.0914927	0.0341615	0.125654
RFX5	7919971	0.0253897	-0.0262207	0.0849739	0.0587531
SELENBP1	7919984	0.364073	0.0276011	0.642248	0.669849
POGZ	7920000	-0.129297	-0.313417	0.231939	-0.0814782
CELF3	7920027	-0.117447	-0.0560683	-0.156635	-0.212704
MRPL9	7920047	0.490942	0.389892	0.151081	0.540972
TDRKH	7920057	-0.112228	0.230284	0.217396	0.44768
LINGO4	7920077	-0.146228	0.0172104	-0.235392	-0.218182
RORC	7920082	-0.0510591	-0.0642082	0.0729876	0.0087794
THEM5	7920100	-0.170337	-0.166812	0.0185351	-0.148277
THEM4	7920114	-0.134045	-0.582748	0.278254	-0.304494
S100A10	7920123	0.528938	0.523755	0.292311	0.816067
S100A11	7920128	0.247061	-0.158033	0.612763	0.45473
TCHHL1	7920135	-0.137024	-0.0602392	-0.0919812	-0.15222
TCHH	7920141	0.0352593	0.0812323	0.114115	0.195347
RPTN	7920146	0.0367178	-0.0312185	-0.0466789	-0.0778974
HRNR	7920155	-0.182875	-0.00940225	-0.118668	-0.12807
FLG	7920165	-0.0344396	-0.0953168	-0.0316996	-0.127016
FLG2	7920175	0.00301879	-0.110568	0.0110425	-0.0995257
CRNN	7920178	-0.135617	-0.127233	-0.166703	-0.293936
LCE3E	7920182	-0.309266	-0.163798	-0.251626	-0.415424
LCE3D	7920185	-0.236632	-0.1103	-0.219708	-0.330008
LCE3A	7920191	-0.0116613	-0.0555682	-0.00676683	-0.062335
LCE1C	7920193	-0.072194	-0.186022	0.000556398	-0.185465
SPRR2D	7920196	0.122227	-0.148218	0.0421129	-0.106105
SPRR2A	7920205	-0.31289	-0.108834	0.0109252	-0.0979091
SPRR2E	7920214	-0.0828188	0.0352004	-0.182861	-0.147661
PGLYRP3	7920220	-0.10416	-0.264827	0.0939125	-0.170915
PGLYRP4	7920228	0.0912378	-0.12728	0.468866	0.341586
S100A12	7920238	0.639927	-0.0429634	-0.0461521	-0.0891155
S100A8	7920244	1.55118	-0.226077	0.544308	0.31823
S100A7L2	7920249	0.0559693	0.0149132	-0.182105	-0.167192
S100A7	7920252	-0.316449	0.085948	-0.142976	-0.0570281
S100A6	7920258	0.404103	0.260562	0.508089	0.76865
S100A5	7920264	-0.092987	-0.00927316	-0.203583	-0.212857
S100A4	7920271	1.04417	0.402006	0.72798	1.12999
S100A3	7920278	-0.0937784	0.0402187	-0.0544906	-0.0142719
S100A2	7920285	0.104625	-0.0155253	-0.0280561	-0.0435813
S100A16	7920291	-0.0378985	2.00138	-0.873302	1.12808
S100A14	7920297	-0.18712	-0.0963267	-0.101157	-0.197483
S100A13	7920303	0.106051	-0.0958035	-0.112751	-0.208554
ILF2	7920317	0.473368	0.506606	0.15754	0.664146
GATAD2B	7920341	-0.0131944	-0.142849	0.262761	0.119912
DENND4B	7920354	-0.0475173	6.79324e-05	-0.0369495	-0.0368816
CRTC2	7920382	-0.165728	-0.173252	0.0774713	-0.0957805
SLC39A1	7920401	0.0697022	0.460826	-0.148664	0.312162
JTB	7920409	0.158301	0.216588	0.374837	0.591425
NUP210L	7920426	-0.0854899	-0.0197096	-0.0616126	-0.0813223
C1orf189	7920487	0.169916	0.353606	-0.0107422	0.342863
C1orf43	7920492	0.513128	0.482208	0.0661748	0.548383
SHE	7920506	-0.45961	-0.00441064	-0.35896	-0.36337
UBE2Q1	7920515	0.196328	0.117817	0.0325707	0.150387
ADAR	7920531	-0.00649159	0.0675165	0.320883	0.3884
KCNN3	7920552	-0.121289	0.243515	-0.230549	0.0129657
PMVK	7920567	0.0355818	-0.0250109	-0.200443	-0.225454
PBXIP1	7920575	-0.328848	-0.882678	-0.11602	-0.998697
PYGO2	7920594	0.252339	-0.0319683	0.272924	0.240956
SHC1	7920600	0.022288	0.177015	0.0496784	0.226694
DCST2	7920616	-0.403981	-0.438452	-0.202677	-0.641129
DPM3	7920633	0.11354	-0.0881979	0.0889523	0.000754355
MUC1	7920642	0.220643	0.635232	0.840034	1.47527
KRTCAP2	7920659	0.268202	0.265082	0.174523	0.439604
THBS3	7920664	-0.272018	-0.647907	-0.305813	-0.95372
GBAP1	7920687	0.205116	-0.572504	0.27547	-0.297034
GBA	7920697	0.271617	-0.196432	0.491172	0.294741
FAM189B	7920707	0.188988	0.083406	0.199564	0.28297
SCAMP3	7920725	0.0678084	0.347647	0.0660525	0.4137
CLK2	7920737	-0.0300062	-0.104431	0.00217811	-0.102253
PKLR	7920744	0.218714	0.130204	0.179979	0.310183
ASH1L	7920766	-0.391501	-0.281486	-0.294196	-0.575682
YY1AP1	7920799	-0.142189	-0.0644377	0.0318939	-0.0325438
GON4L	7920810	-0.280313	-0.00715255	-0.166305	-0.173457
RIT1	7920839	-0.360381	0.128969	-0.474022	-0.345053
KIAA0907	7920852	-0.261087	-0.290333	0.0932716	-0.197061
SNORA42	7920873	-0.682175	-0.305427	0.11034	-0.195087
SCARNA4	7920875	-0.132347	-0.348309	-0.201655	-0.549964
ARHGEF2	7920877	0.244511	-0.00540051	-0.11686	-0.122261
SSR2	7920903	0.178616	-0.0281404	0.0514128	0.0232724
PAQR6	7920928	-0.240837	-0.116038	-0.32621	-0.442248
SMG5	7920944	0.121904	0.318751	0.125491	0.444242
C1orf85	7920971	0.088403	-0.583529	0.172704	-0.410824
VHLL	7920980	0.126724	0.0125342	0.187372	0.199906
CCT3	7920984	0.480326	0.563967	0.250593	0.81456
C1orf61	7921003	-0.194673	-0.0116386	-0.202606	-0.214244
MEF2D	7921014	-0.0862564	-0.115582	-0.382658	-0.49824
IQGAP3	7921033	1.18432	1.09431	0.707596	1.80191
NES	7921088	-0.144812	-0.06546	-0.20708	-0.27254
CRABP2	7921099	0.241493	0.211017	0.0181423	0.229159
ISG20L2	7921110	0.414557	0.430274	0.4324	0.862674
MRPL24	7921121	0.572989	0.563076	0.426893	0.989969
HDGF	7921133	0.297145	0.400376	0.0682543	0.46863
SH2D2A	7921144	0.739066	1.20336	0.205656	1.40901
INSRR	7921155	-0.0801239	-0.0395172	-0.018781	-0.0582981
ARHGEF11	7921179	-0.0532759	-0.0149119	0.253022	0.23811
ETV3L	7921222	0.0444142	0.119175	-0.178102	-0.0589265
ETV3	7921228	-0.483058	0.222761	-0.553505	-0.330744
FCRL5	7921237	-0.189877	-0.147187	-0.0885909	-0.235778
FCRL4	7921259	0.0169035	-0.0205392	0.0470398	0.0265006
FCRL3	7921275	-0.0402744	0.117038	-0.15546	-0.038422
FCRL2	7921298	-0.165263	0.0370263	-0.177078	-0.140052
FCRL1	7921319	-0.0242808	-0.117364	-0.0511591	-0.168523
CD5L	7921332	-0.167356	-0.144761	-0.196146	-0.340907
LOC729866	7921342	0.0464979	-0.0631126	-0.0488029	-0.111915
CD1B	7921346	-0.160547	-0.0540908	0.0179188	-0.036172
OR10T2	7921354	-0.233466	-0.112229	-0.134179	-0.246408
OR10K2	7921356	-0.256785	-0.149128	-0.164185	-0.313313
OR6Y1	7921360	-0.151482	-0.102217	-0.164951	-0.267168
OR6P1	7921362	-0.0692569	-0.0131438	-0.164984	-0.178128
OR10X1	7921364	-0.107809	-0.112322	-0.0075754	-0.119897
SPTA1	7921367	1.77691	1.25998	1.26628	2.52626
OR6K2	7921420	-0.281368	-0.171826	-0.201287	-0.373113
OR6K3	7921422	-0.123884	-0.0240529	-0.126428	-0.150481
OR6N1	7921427	-0.138611	-0.0314974	-0.183774	-0.215271
OR6N2	7921429	-0.273111	-0.11664	-0.169567	-0.286207
AIM2	7921434	0.0476413	0.116512	0.114684	0.231196
OR10J3	7921445	-0.19078	-0.118504	-0.109204	-0.227709
OR10J5	7921447	0.111783	-0.0300289	0.039781	0.00975208
CRP	7921449	-0.00546221	-0.0328658	-0.177354	-0.21022
VSIG8	7921462	-0.0443856	-0.0562984	-0.0667214	-0.12302
CCDC19	7921473	0.0504423	0.341348	-0.196317	0.14503
TAGLN2	7921487	0.114437	0.444628	-0.0652227	0.379405
IGSF9	7921492	-0.0166672	-0.0494317	0.103545	0.0541137
SLAMF9	7921516	-0.0845601	0.0783155	0.0162356	0.0945511
PIGM	7921526	-0.180332	-0.521	0.324118	-0.196883
KCNJ10	7921533	-0.209927	-0.0873595	-0.0740894	-0.161449
IGSF8	7921538	0.0326212	-0.127488	-0.00385633	-0.131344
DCAF8	7921552	-0.334578	-0.348552	-0.0410046	-0.389557
PEX19	7921571	0.108499	0.252093	0.111748	0.363841
COPA	7921583	0.136033	0.372523	0.104278	0.476801
SLAMF6	7921625	0.813653	0.409256	0.355335	0.764591
CD84	7921637	0.991669	0.855835	0.159616	1.01545
SLAMF1	7921652	-0.180658	0.279514	-0.419245	-0.139731
CD48	7921667	0.983792	-1.06931	0.109102	-0.960205
CD244	7921677	0.154085	-0.809	-0.464719	-1.27372
ITLN1	7921690	0.138179	-0.104431	0.101302	-0.00312872
ITLN2	7921702	-0.00617695	0.062857	-0.0407099	0.0221471
F11R	7921713	-0.120929	-0.178046	-0.31577	-0.493816
USF1	7921738	-0.0107079	-0.364646	0.190958	-0.173688
ARHGAP30	7921752	0.04336	-0.280858	-0.400297	-0.681155
PVRL4	7921773	0.0812869	0.0509517	-0.0243396	0.0266121
PFDN2	7921786	0.386383	0.39382	0.248129	0.641948
DEDD	7921793	0.234717	0.483888	0.126136	0.610025
B4GALT3	7921806	0.457903	0.709539	0.0619893	0.771528
ADAMTS4	7921821	-0.187199	-0.0319331	-0.133703	-0.165636
APOA2	7921834	-0.0702428	-0.0848432	-0.070514	-0.155357
NR1I3	7921840	-0.299845	-0.105761	-0.262237	-0.367998
MPZ	7921852	0.0175495	-0.345617	-0.0718996	-0.417517
C1orf192	7921862	-0.19328	-0.212139	0.0335902	-0.178549
OLFML2B	7921882	0.972864	-0.0651423	0.281692	0.21655
C1orf111	7921895	-0.207756	-0.0872205	-0.216055	-0.303276
SH2D1B	7921900	-0.19469	-0.0478914	-0.0964073	-0.144299
C1orf110	7921909	-0.119001	-0.0634108	-0.000549555	-0.0639604
RGS5	7921916	-0.337772	-0.357778	0.0259798	-0.331798
LMX1A	7921936	-0.177617	-0.0866534	-0.152331	-0.238985
RXRG	7921955	-0.0800229	-0.0751534	-0.146034	-0.221188
ALDH9A1	7921970	-0.00496005	0.0754208	-0.346492	-0.271071
TMCO1	7921987	0.165822	0.210873	0.265167	0.47604
FAM78B	7922001	-0.175498	-0.150565	-0.0814288	-0.231993
TADA1	7922008	0.0309022	-0.0417235	0.149388	0.107665
ILDR2	7922018	0.374282	0.28226	-0.183197	0.0990633
GPA33	7922029	0.385521	-0.404483	-0.158699	-0.563182
CD247	7922040	0.0666096	0.00363885	-0.0966622	-0.0930233
CREG1	7922051	0.384452	-0.21611	0.490988	0.274878
ADCY10	7922058	-0.0333392	0.195373	-0.309193	-0.11382
BRP44	7922095	0.474285	0.511536	0.587303	1.09884
GPR161	7922108	0.0799109	0.546688	0.0861993	0.632888
ANKRD36BP1	7922121	0.394101	0.112217	0.730255	0.842472
XCL2	7922127	0.0458034	0.00311091	-0.0615769	-0.058466
DPT	7922130	-0.253794	-0.125554	-0.173693	-0.299247
NME7	7922137	-0.319392	-0.073487	-0.322156	-0.395643
C1orf114	7922152	0.143209	-0.0636565	0.214668	0.151011
SLC19A2	7922162	0.462386	0.0122909	0.362911	0.375202
F5	7922174	-0.814671	-0.525161	0.117186	-0.407975
SELP	7922200	-0.806137	1.15037	-1.12594	0.0244328
SELL	7922219	-0.404151	-1.97179	-1.85462	-3.82641
SELE	7922229	-0.0670678	0.00300412	-0.136013	-0.133009
C1orf156	7922243	0.244167	-0.188818	0.325102	0.136283
SCYL3	7922250	-0.24026	-0.518948	0.173406	-0.345543
KIFAP3	7922268	0.170002	0.798806	0.5836	1.38241
MYOC	7922301	-0.0380701	0.0422267	-0.0292267	0.013
VAMP4	7922309	-0.159733	-0.761022	0.179011	-0.582011
PIGC	7922330	0.0809452	-0.0356605	0.0831877	0.0475272
TNFSF18	7922337	-0.111115	0.077695	-0.319398	-0.241703
TNFSF4	7922343	-0.779495	-0.219032	-1.54096	-1.75999
LOC646870	7922351	-0.464254	-0.139982	-0.401388	-0.54137
SLC9A11	7922353	-0.188448	0.213788	-0.1978	0.0159874
ANKRD45	7922382	0.146355	0.828104	0.397168	1.22527
CENPL	7922391	0.631386	0.628594	0.87123	1.49982
SNORD47	7922402	0.217495	0.369452	0.559267	0.928719
SNORD80	7922404	0.537662	0.306189	0.857875	1.16406
SNORD79	7922406	0.40437	0.165364	0.654086	0.819451
SNORD78	7922408	0.92034	0.327906	0.563855	0.891762
SNORD44	7922410	0.531469	0.188414	0.616477	0.804891
SNORD77	7922412	1.09531	0.437711	1.10718	1.54489
SNORD76	7922414	0.290493	0.18403	0.327521	0.511551
SNORD75	7922416	0.927473	0.316371	0.582407	0.898778
SNORD74	7922418	0.624845	0.325093	0.195341	0.520434
SERPINC1	7922420	0.0498321	0.230376	-0.128286	0.10209
RC3H1	7922432	-0.180676	-0.0591134	-0.129076	-0.18819
MRPS14	7922462	0.132705	-0.0928554	0.348601	0.255745
KIAA0040	7922474	0.296282	-0.537976	0.589057	0.0510805
TNR	7922482	-0.26604	-0.175728	-0.013326	-0.189054
RFWD2	7922504	-0.182872	-0.0299039	-0.171656	-0.201559
ASTN1	7922525	-0.0961731	-0.0660206	0.00972213	-0.0562985
SEC16B	7922550	0.00189648	-0.404871	-0.130912	-0.535783
NCRNA00083	7922590	-0.157359	-0.0970018	0.0244069	-0.072595
LOC646976	7922596	-0.0414873	0.0227409	-0.133256	-0.110515
ANGPTL1	7922598	-0.255309	-0.141924	-0.304111	-0.446036
ABL2	7922610	0.0431448	-0.040475	-0.0868488	-0.127324
NPHS2	7922627	0.00968124	0.0233077	0.0694867	0.0927944
ACBD6	7922656	-0.129704	-0.0854163	0.0980486	0.0126323
STX6	7922669	-0.130761	0.0182229	-0.0967592	-0.0785362
ZNF648	7922686	-0.183034	-0.068787	-0.185743	-0.25453
TEDDM1	7922703	0.023718	-0.0636434	-0.121869	-0.185513
RNASEL	7922707	-0.21708	-0.427429	0.0852294	-0.3422
RGS16	7922717	0.0682017	1.02813	-0.244742	0.783389
RGS8	7922727	-0.0180679	-0.070171	-0.0190839	-0.0892549
C1orf14	7922737	-0.023343	-0.00915653	0.0418828	0.0327263
NMNAT2	7922756	-0.100211	-0.126887	-0.0396525	-0.16654
NCF2	7922773	0.493852	0.655501	-0.833991	-0.17849
ARPC5	7922793	0.0951132	0.181725	-0.04621	0.135515
APOBEC4	7922804	-0.0689054	0.0132211	-0.1102	-0.0969789
GLT25D2	7922807	0.141558	-0.00449424	0.0886659	0.0841717
EDEM3	7922823	0.110304	-0.0360239	0.0820561	0.0460321
FAM129A	7922846	1.04978	1.17174	0.314967	1.48671
C1orf25	7922870	-0.0786892	0.100327	0.0246909	0.125018
IVNS1ABP	7922889	0.5936	0.737552	0.234318	0.97187
TPR	7922912	-0.0324964	0.0664752	0.325913	0.392389
PDC	7922969	-0.181564	-0.18772	-0.113262	-0.300982
PTGS2	7922976	-0.817386	1.12252	-1.05614	0.0663863
FAM5C	7922994	-0.161481	-0.00708386	-0.123257	-0.130341
UCHL5	7923007	0.278809	0.464057	0.493034	0.95709
GLRX2	7923027	0.286495	0.336634	0.0981341	0.434768
B3GALT2	7923034	-0.240726	0.133738	-0.317297	-0.183558
KCNT2	7923043	-0.517841	1.21931	-0.703204	0.516106
F13B	7923073	-0.0654601	0.0193849	-0.0858801	-0.0664952
ASPM	7923086	2.18693	2.1736	1.13418	3.30778
ZBTB41	7923119	0.122486	-0.226321	0.187494	-0.0388267
ATP6V1G3	7923164	0.0497052	0.114614	0.0555637	0.170178
ZNF281	7923183	0.00477398	0.0946708	0.0427293	0.1374
KIF14	7923189	1.30322	1.38203	0.769848	2.15188
DDX59	7923221	-0.383665	-0.326833	-0.167382	-0.494215
KIF21B	7923233	0.225648	0.429558	-0.201731	0.227827
CACNA1S	7923271	-0.0756439	0.0218043	-0.144539	-0.122735
TMEM9	7923319	0.056603	0.0341816	-0.0848765	-0.0506949
TNNT2	7923332	0.195413	-0.0486243	0.131681	0.0830569
LAD1	7923347	0.0284548	0.13379	-0.086848	0.0469425
TNNI1	7923360	-0.0243887	-0.0944262	-0.0158062	-0.110232
PHLDA3	7923372	0.255509	0.455314	0.0251492	0.480463
CSRP1	7923378	0.0621744	0.194191	0.0742067	0.268398
LMOD1	7923386	-0.121006	-0.0757309	0.00901723	-0.0667136
ARL8A	7923394	-0.0109902	-0.0192085	-0.204453	-0.223662
PTPN7	7923406	0.452373	0.714507	-0.00800837	0.706498
UBE2T	7923426	1.35602	1.29604	0.808585	2.10462
KDM5B	7923453	0.0676554	-0.188686	-0.0309033	-0.219589
RABIF	7923483	0.141505	0.0560713	0.263055	0.319127
KLHL12	7923489	0.054101	-0.0613693	0.0757237	0.0143544
ADIPOR1	7923503	0.441036	0.478203	0.448589	0.926792
CYB5R1	7923516	-0.0691527	-0.139748	-0.0987152	-0.238463
MYOG	7923528	-0.11835	-0.0891756	-0.0962242	-0.1854
MYBPH	7923534	-0.186892	-0.0703394	-0.142892	-0.213232
CHI3L1	7923547	-0.0834924	-0.0705272	-0.138143	-0.20867
CHIT1	7923562	-0.0590047	-0.0915807	-0.0820738	-0.173654
FMOD	7923578	0.300869	0.872023	0.365778	1.2378
C1orf157	7923584	-0.104128	-0.101204	-0.0621225	-0.163327
ETNK2	7923596	-0.653868	-0.279208	-0.853832	-1.13304
REN	7923608	-0.0266377	0.0272006	-0.0304392	-0.00323862
KISS1	7923621	0.0906889	-0.0392053	0.145378	0.106172
GOLT1A	7923628	-0.548321	-0.103515	-0.376055	-0.47957
PLEKHA6	7923635	-0.201507	0.0911306	-0.253638	-0.162508
PPP1R15B	7923659	-0.0976348	0.287548	-0.00416315	0.283385
PIK3C2B	7923662	-0.681576	-1.65341	-0.897935	-2.55135
LRRN2	7923700	-0.128224	0.0282978	-0.387141	-0.358844
TMEM81	7923707	-0.0620075	0.0171187	0.11187	0.128989
RBBP5	7923712	0.166112	0.150624	0.296617	0.447241
DSTYK	7923731	-0.11293	0.117395	-0.0522597	0.0651353
NUAK2	7923753	-0.276431	-0.206612	0.040983	-0.165629
KLHDC8A	7923762	-0.00454925	0.121552	-0.0270009	0.0945509
LEMD1	7923772	-0.152903	-0.182579	-0.0449655	-0.227545
ELK4	7923778	-0.207812	-0.416854	0.179337	-0.237517
SLC45A3	7923792	0.525488	0.134002	-0.366961	-0.232959
RAB7L1	7923812	-0.53093	-0.289042	0.0255826	-0.26346
SLC41A1	7923824	-0.449878	0.0210632	0.12478	0.145843
PM20D1	7923837	-0.748503	-0.835179	-0.262718	-1.0979
SLC26A9	7923850	-0.0283563	0.0452865	-0.138918	-0.0936318
C1orf186	7923875	1.97751	-0.477273	0.385991	-0.0912824
LGTN	7923889	0.196904	-0.234651	0.228681	-0.00596941
IL10	7923907	-0.142231	-0.0145363	-0.00662094	-0.0211573
FAIM3	7923917	-0.819333	-1.13693	-0.43763	-1.57456
PIGR	7923929	-0.0749071	0.0207562	-0.150641	-0.129884
FCAMR	7923942	-0.150811	-0.108604	-0.13871	-0.247314
C1orf116	7923958	-0.114334	0.243032	0.0470173	0.29005
YOD1	7923967	0.264531	0.741903	0.254071	0.995974
CD34	7923978	-0.249272	-0.921899	0.00194432	-0.919954
PLXNA2	7923991	-0.0738969	0.208529	0.238584	0.447113
LAMB3	7924029	0.148831	0.334337	0.290805	0.625142
C1orf74	7924055	0.198857	-0.185489	0.449284	0.263795
IRF6	7924058	0.333946	-0.565211	0.638082	0.0728714
KCNH1	7924071	-0.142336	-0.0735786	-0.216739	-0.290317
RD3	7924085	-0.238089	-0.131374	-0.0800726	-0.211446
SLC30A1	7924092	-0.102947	-0.14304	0.204597	0.0615573
NEK2	7924096	1.07925	1.13807	0.553797	1.69187
LPGAT1	7924107	-0.265925	0.0365339	-0.0778386	-0.0413047
INTS7	7924119	0.404512	0.347062	0.315659	0.66272
RPL21P28	7924144	0.513984	0.114855	0.455008	0.569864
TMEM206	7924150	0.440214	0.418365	-0.149725	0.268641
BATF3	7924166	-0.0834521	0.117519	0.0368393	0.154358
NSL1	7924172	0.193788	0.0104755	0.289686	0.300161
C1orf227	7924180	-0.409097	-0.662703	-0.0677151	-0.730418
LQK1	7924184	-0.228654	-0.1044	0.00158628	-0.102813
ANGEL2	7924190	-0.12657	-0.338909	0.227515	-0.111394
PTPN14	7924207	0.163509	1.06445	-0.530752	0.533695
USH2A	7924233	-0.155824	-0.0932592	-0.0520486	-0.145308
ESRRG	7924309	0.0679469	-0.0937717	-0.0205225	-0.114294
GPATCH2	7924327	-0.266794	0.180323	-0.0824329	0.0978896
SLC30A10	7924342	-0.0586033	0.124538	-0.175066	-0.0505278
EPRS	7924351	0.379828	0.285576	0.594676	0.880252
BPNT1	7924388	0.15066	0.0637482	0.0615145	0.125263
RAB3GAP2	7924405	-0.0260138	0.00182898	0.0709703	0.0727993
LOC400804	7924445	-0.159393	-0.0752979	-0.297604	-0.372901
DUSP10	7924450	0.125626	0.25528	-0.341229	-0.085948
HHIPL2	7924465	-0.0829134	-0.0385617	-0.0791052	-0.117667
TAF1A	7924476	0.136024	0.0097503	0.292241	0.301991
TLR5	7924499	0.0711151	1.05304	0.458776	1.51182
SUSD4	7924508	-0.193789	0.155314	-0.243997	-0.0886838
TP53BP2	7924526	0.0542153	0.274785	0.123714	0.398499
NVL	7924558	0.0861762	0.369973	0.0945374	0.464511
WDR26	7924582	-0.300851	-0.0908554	-0.070841	-0.161696
LBR	7924603	0.362291	-0.244389	0.689559	0.44517
ENAH	7924619	0.0545801	0.802773	-0.0395179	0.763256
TMEM63A	7924636	-0.589513	-0.475458	-0.393261	-0.868719
LEFTY1	7924663	-0.13367	-0.131454	-0.200456	-0.331909
PYCR2	7924669	0.163336	0.210857	0.16504	0.375896
LEFTY2	7924682	-0.24058	-0.153507	-0.167369	-0.320876
C1orf55	7924686	0.0360247	0.706963	-0.239687	0.467276
ACBD3	7924701	-0.0470022	0.21438	-0.0835514	0.130829
LIN9	7924712	0.0943059	-0.135515	0.689956	0.554441
PARP1	7924733	0.414296	0.186354	0.605375	0.791729
ITPKB	7924760	-0.0708352	0.190818	-0.0238146	0.167003
CDC42BPA	7924773	0.0154791	0.298257	0.366143	0.664401
PRO2012	7924817	-0.848726	-0.118342	-1.03816	-1.1565
ZNF847P	7924821	-0.0754832	-0.133419	0.0267493	-0.10667
JMJD4	7924823	0.211561	0.230603	0.0675996	0.298203
WNT9A	7924832	0.0995851	0.0850409	0.0230843	0.108125
C1orf35	7924842	0.0809289	-0.108512	0.0721027	-0.0364088
MRPL55	7924853	0.0272431	-0.0898957	0.144947	0.055051
TRIM11	7924868	0.171188	0.321915	-0.020133	0.301782
TRIM17	7924874	-0.139557	-0.0790785	-0.129945	-0.209023
HIST3H3	7924884	0.271822	0.136903	0.182838	0.319741
HIST3H2A	7924888	0.343588	-0.165662	0.552368	0.386705
C1orf96	7924897	0.220407	0.177858	-0.0192313	0.158627
ACTA1	7924910	0.293133	0.35296	0.0960517	0.449012
NUP133	7924923	0.188443	-0.0210115	0.361046	0.340034
ABCB10	7924956	0.422028	0.164919	0.427168	0.592087
TAF5L	7924969	0.298676	0.244189	0.221412	0.465601
PGBD5	7924977	0.0116631	-0.0391451	-0.0525703	-0.0917154
AGT	7924987	-0.0301766	-0.0038247	-0.0923936	-0.0962183
C1orf198	7924996	0.367173	0.633119	0.456186	1.08931
TTC13	7925003	0.154987	-0.0196769	0.688528	0.668851
FAM89A	7925028	0.41045	-0.0328464	0.575032	0.542185
FLJ30430	7925031	0.0564305	-0.0606104	0.00912985	-0.0514806
C1orf131	7925033	0.129693	-0.155853	0.127817	-0.0280367
EXOC8	7925043	-0.154779	-0.0849722	0.0861445	0.0011723
EGLN1	7925048	0.248275	-0.0496001	0.0767942	0.0271941
SNRPD2P2	7925058	-0.0640559	-0.0507066	-0.0693606	-0.120067
SIPA1L2	7925062	-0.28488	-0.683434	-0.100468	-0.783902
PCNXL2	7925089	-0.766873	-1.37895	-0.69739	-2.07634
TARBP1	7925130	-0.491867	-1.19916	-0.0133735	-1.21254
IRF2BP2	7925161	0.0821102	-0.225588	0.115566	-0.110022
PP2672	7925170	-0.250117	-0.0722537	-0.177348	-0.249602
TOMM20	7925174	0.500841	0.277649	0.406626	0.684275
SNORA14B	7925182	-0.61951	0.229676	-0.377194	-0.147519
RBM34	7925184	0.116962	0.026879	0.327283	0.354162
ARID4B	7925201	-0.516971	-0.179812	-0.107942	-0.287754
B3GALNT2	7925229	0.383915	0.258591	0.281765	0.540356
GNG4	7925250	0.086591	0.36543	-0.114094	0.251336
LYST	7925257	0.11105	0.0900374	-0.278171	-0.188133
NID1	7925320	1.31992	1.55959	0.320687	1.88028
ERO1LB	7925342	-0.3769	-0.374531	-0.524399	-0.898931
HEATR1	7925364	0.192765	0.193458	0.343377	0.536835
MT1P2	7925413	0.0490296	0.486872	0.257345	0.744216
ZP4	7925419	-0.297065	0.0255058	-0.214039	-0.188534
GREM2	7925452	-0.116667	-0.0576206	-0.0214162	-0.0790367
RGS7	7925457	-0.0422225	-0.0509601	-0.0243655	-0.0753256
FH	7925480	0.537663	0.458817	0.595678	1.0545
OPN3	7925492	0.772785	0.069237	0.267218	0.336455
CHML	7925500	0.23035	0.0183219	0.335746	0.354068
MAP1LC3C	7925504	-0.010649	-0.0171305	-0.130747	-0.147877
PLD5	7925511	0.0543915	0.0690738	-0.0175887	0.0514851
AKT3	7925531	-0.38507	-0.48301	-0.0392329	-0.522243
ADSS	7925550	0.0406498	-0.208736	0.345982	0.137247
HNRNPU	7925565	0.0208818	0.154922	0.122569	0.277492
SMYD3	7925589	0.237953	0.106809	-0.307509	-0.2007
TFB2M	7925611	0.478858	1.01023	-0.157138	0.853096
ZNF695	7925662	0.582454	0.620667	0.214533	0.8352
ZNF670	7925672	0.14204	0.150625	0.643004	0.793629
ZNF669	7925677	-0.0107724	-0.101486	0.0134191	-0.0880665
C1orf229	7925687	0.170373	-0.0705019	0.0795956	0.00909373
ZNF124	7925691	-0.126939	-0.277794	0.0360767	-0.241717
ZNF496	7925705	-0.0857234	-0.1868	-0.0669084	-0.253708
OR2B11	7925718	-0.178356	-0.0987196	-0.0466099	-0.145329
OR2C3	7925720	-0.298712	-0.163055	-0.0131447	-0.1762
OR13G1	7925726	0.0396691	0.0316402	-0.0109111	0.0207291
OR6F1	7925728	-0.306873	-0.141703	-0.0281858	-0.169889
OR1C1	7925732	-0.135887	-0.108603	-0.0114027	-0.120006
OR14A16	7925735	-0.191596	0.19473	-0.469752	-0.275022
OR11L1	7925737	-0.172588	0.0940533	-0.322353	-0.2283
OR2T33	7925741	-0.235276	-0.188735	-0.333994	-0.522729
OR2T12	7925743	-0.249321	-0.186143	-0.339232	-0.525375
OR2M7	7925745	-0.0659135	-0.151235	-0.0740168	-0.225252
OR2T29	7925747	-0.168873	-0.131992	-0.253173	-0.385165
OR2T34	7925749	-0.339311	-0.103798	-0.121322	-0.22512
OR2T10	7925751	-0.339602	-0.114208	-0.257639	-0.371847
OR2T11	7925755	-0.134442	-0.000527766	-0.205179	-0.205707
OR2T35	7925757	-0.359838	-0.242255	-0.233896	-0.47615
OR2T27	7925759	0.0429646	0.0593392	-0.112867	-0.0535276
OR14I1	7925761	-0.315681	-0.074438	-0.157143	-0.231581
SH3BP5L	7925763	0.0207996	-0.0282427	0.0281082	-0.000134496
ZNF692	7925773	0.278069	-0.00309155	0.310413	0.307321
ZMYND11	7925792	-0.100472	0.08936	0.129118	0.218478
C10orf108	7925813	-0.103525	-0.0060123	-0.101363	-0.107375
GTPBP4	7925823	0.365965	0.948004	0.254882	1.20289
C10orf110	7925846	-0.0241564	0.456764	-0.325516	0.131248
WDR37	7925851	-0.297317	-0.368328	-0.140119	-0.508447
NCRNA00200	7925870	-0.202643	-0.308635	-0.248458	-0.557093
PFKP	7925876	0.209016	0.483443	-0.0656169	0.417826
AKR1E2	7925904	0.157995	-0.218808	-0.0300188	-0.248827
AKR1C3	7925929	-0.191457	-0.711542	0.2604	-0.451142
AKR1C4	7925939	-0.0617898	0.0275862	-0.190807	-0.16322
UCN3	7925950	0.0643745	0.0302557	0.0550067	0.0852624
NET1	7925954	0.65047	1.65859	0.31014	1.96873
CALML3	7925972	-0.0448741	-0.0661384	0.0886534	0.0225151
C10orf18	7925978	-0.172083	0.149441	-0.0396692	0.109771
FBXO18	7925996	0.0560648	0.292184	-0.085311	0.206873
RBM17	7926021	0.0283849	0.0350232	0.228628	0.263651
PFKFB3	7926037	-0.12969	0.381406	-0.66223	-0.280824
ITIH2	7926061	-0.0731556	-0.0183342	-0.0597294	-0.0780636
ATP5C1	7926084	0.301376	0.1231	-0.0375707	0.0855293
TAF3	7926096	-0.0610709	0.0618454	0.0353624	0.0972077
GATA3	7926105	-1.52044	-1.58782	-0.565942	-2.15376
CELF2	7926127	-0.319275	-0.392946	-0.0898106	-0.482756
ECHDC3	7926152	0.250264	0.228276	0.277042	0.505319
C10orf47	7926158	0.197426	0.404706	-0.067827	0.336879
DHTKD1	7926170	0.261994	-0.149186	0.00937251	-0.139813
SEC61A2	7926189	-0.230315	-0.116021	-0.521831	-0.637851
CDC123	7926207	0.310942	0.384615	-0.11455	0.270065
CAMK1D	7926223	-0.253261	0.431745	-0.223028	0.208717
OPTN	7926239	-0.351634	0.105534	-0.176004	-0.0704695
MCM10	7926259	2.0077	1.99391	0.935493	2.9294
PRPF18	7926283	-0.39796	-0.141407	-0.260005	-0.401412
HSPA14	7926299	0.252909	0.527154	0.281879	0.809032
SUV39H2	7926319	0.97356	0.889026	0.564602	1.45363
MEIG1	7926330	0.0708962	-0.0347252	0.325531	0.290806
OLAH	7926334	-0.13056	-0.00892547	0.00966868	0.000743211
RPP38	7926345	0.405367	-0.0208346	0.703873	0.683038
PTER	7926356	-0.0392123	0.249557	-0.00345928	0.246098
VIM	7926368	0.180459	-0.143589	0.316301	0.172712
STAM	7926385	0.52945	0.640746	0.414028	1.05477
SLC39A12	7926486	-0.0177706	-0.065415	0.0577635	-0.00765147
CACNB2	7926506	-0.716662	0.416649	-0.869978	-0.453329
ARL5B	7926531	0.0780879	0.483653	0.0928253	0.576479
PLXDC2	7926545	-0.128251	0.2785	-0.150126	0.128374
MLLT10	7926565	-0.0616504	-0.228164	0.195064	-0.0331009
COMMD3	7926596	0.0898111	-0.192946	0.439363	0.246417
BMI1	7926609	-0.157698	-0.278196	0.212783	-0.0654134
SPAG6	7926622	-0.0487744	-0.110093	-0.200094	-0.310186
ARMC3	7926638	0.0695762	0.148138	-0.0226915	0.125447
MSRB2	7926661	0.217224	-0.0974288	0.19119	0.0937611
PTF1A	7926674	-0.0246083	-0.014072	-0.0315579	-0.0456299
OTUD1	7926677	-0.672125	-0.555758	-0.325834	-0.881591
KIAA1217	7926679	0.0341291	-0.0525261	-0.0140728	-0.0665989
THNSL1	7926708	0.119691	0.103951	0.617868	0.721819
GPR158	7926715	0.0534251	0.121997	-0.190609	-0.0686125
MYO3A	7926728	-0.0663323	-0.0735066	0.0396207	-0.0338859
GAD2	7926766	-0.165432	-0.0389736	-0.0902278	-0.129201
APBB1IP	7926786	0.209493	-1.01145	0.128533	-0.882912
PDSS1	7926807	0.816871	0.747573	0.481143	1.22872
MASTL	7926821	0.994275	1.09926	0.649848	1.74911
RAB18	7926836	-0.0973885	-0.09113	0.213427	0.122297
WAC	7926851	-0.00991664	-0.0256269	0.242914	0.217287
BAMBI	7926875	-0.0157541	0.609611	-0.206949	0.402662
LYZL1	7926889	0.0374175	-0.0258753	-0.0209339	-0.0468092
MAP3K8	7926900	-0.259018	-0.205421	-0.141266	-0.346687
ZEB1	7926916	-0.462506	-0.575852	-0.255949	-0.831801
C10orf68	7926936	-0.490636	-0.801584	-0.363531	-1.16512
CREM	7926983	-0.149517	-0.148366	0.0548569	-0.0935086
CCNY	7927008	-0.0521521	-0.1056	0.160088	0.0544875
ANKRD30A	7927033	-0.0242663	0.0460124	0.0407902	0.0868026
ZNF33A	7927062	-0.277553	-0.102636	0.0277773	-0.0748582
ZNF37A	7927071	-0.232695	0.0524776	-0.00925144	0.0432261
HSD17B7P2	7927082	-0.196146	0.00991081	-0.173902	-0.163991
LOC399744	7927091	-0.173698	-0.164671	-0.0632087	-0.22788
LOC84856	7927099	-0.121318	0.0333605	-0.0693517	-0.0359912
RET	7927120	-0.158961	-0.0443447	-0.263657	-0.308002
CSGALNACT2	7927146	-0.234082	-0.469315	-0.27482	-0.744135
FXYD4	7927155	-0.0101279	-0.0403068	0.0722161	0.0319093
ZNF487P	7927169	-0.241294	-0.176757	-0.325729	-0.502487
ZNF485	7927173	0.142005	-0.622132	0.599636	-0.0224956
TMEM72	7927179	0.345503	0.130178	0.62632	0.756498
RASSF4	7927186	0.438685	0.0115818	0.190002	0.201584
LOC338579	7927207	0.0566755	-0.0943976	0.0278631	-0.0665344
ALOX5	7927215	-0.0645389	-0.688662	-0.513948	-1.20261
GPRIN2	7927277	-0.235418	-0.15348	-0.244537	-0.398017
PPYR1	7927280	0.182358	0.0110359	-0.0268406	-0.0158047
ANTXRL	7927294	-0.0119598	-0.0929405	0.120156	0.0272155
ANXA8L2	7927307	0.161814	0.0937641	-0.0371151	0.056649
[truncated: 16,460 more rows]
