# Supplementary material for: Epigenetic Reprogramming Sensitizes CML Stem Cells to Combined EZH2 and Tyrosine Kinase Inhibition
Source: Oxford University Press journal article supplement (doi:10.1158/2159-8290.cd-16-0263), 2016-09-14
Supplement: 21598290cd160263-sup-163019_2_supp_3598168_ssvscs.xlsx [file 21598290cd160263-sup-163019_2_supp_3598168_ssvscs.xlsx]

## Sheet: Sample information
SAMPLE NAME	SAMPLE TYPE			DISEASE STATUS	% BCR-ABL1 (FISH)		ELN RESPONSE	Sex (M or F)	TKI(s) USED IN TREATMENT	AFFYMETRIX GENECHIPS	CHIP-SEQ	FLUIDIGM	TLDA	+/- GSK343	+/- GSK343 AFFYMETRIX GENECHIPS	+/- GSK126; +/- EPZ6438	EZH2 shRNAs	+/-TKI LSCs AFFYMETRIX GENECHIPS	LTC-IC +/- GSK343 +/- TKI	NSG XENOGRAFTS
	When	Method	Cell Type		CD34+CD38-	CD34+
CML01	diagnosis	Leukapheresis PB	CD34-enriched	chronic phase	98	99	Failure	M	Imatinib → Dasatinib	√	√	√	√
CML02	diagnosis	Leukapheresis PB	Sorted MNCs	chronic phase	ND	96	Optimal	F	Imatinib	√	√	√	√
CML03	diagnosis	Leukapheresis PB	Sorted MNCs	chronic phase	89	100	Failure	M	Imatinib	√	√	√	√
CML04	diagnosis	Leukapheresis PB	Sorted MNCs	chronic phase	100	>90	Failure	M	Imatinib → Dasatinib → Nilotinib			√
CML05	diagnosis	Leukapheresis PB	Sorted MNCs	chronic phase	100	>90	Failure	F	Imatinib			√						√
CML06	diagnosis	Leukapheresis PB	Sorted MNCs	chronic phase	100	>90	Optimal	F	Imatinib			√						√
CML07	diagnosis	Leukapheresis PB	Sorted MNCs/CD34-enriched	chronic phase	100	>90	Optimal	M	Dasatinib			√		√	√	√
CML08	diagnosis	Leukapheresis PB	Sorted MNCs/CD34-enriched	chronic phase	100	100	Warning	F	Imatinib			√		√		√
CML09	diagnosis	Leukapheresis PB	Sorted MNCs	chronic phase	ND	96	Optimal	F	Imatinib			√
CML10	diagnosis	Leukapheresis PB	CD34-enriched	chronic phase	ND	100	Failure	F	Imatinib → Nilotinib			√
CML11	diagnosis	Leukapheresis PB	CD34-enriched	chronic phase	ND	100	ND	ND	ND			√
CML12	diagnosis	Leukapheresis PB	CD34-enriched	chronic phase	ND	100	Optimal	M	Imatinib			√
CML13	diagnosis	Leukapheresis PB	CD34-enriched	chronic phase	>91	>91	Warning	F	Imatinib					√	√				√
CML14	diagnosis	Leukapheresis PB	CD34-enriched	chronic phase	>91	>91	Warning	F	Imatinib → Dasatinib					√	√				√
CML15	diagnosis	Leukapheresis PB	CD34-enriched	chronic phase	ND	>90	Warning	M	Dasatinib → Imatinib					√
CML16	diagnosis	Leukapheresis PB	Sorted MNCs/CD34-enriched	chronic phase	100	100	Failure	M	Nilotinib → Dasatinib					√		√			√	√
CML17	diagnosis	Leukapheresis PB	Sorted MNCs	chronic phase	93	100	Warning	M	Dasatinib					√
CML18	diagnosis	Leukapheresis PB	CD34-enriched	chronic phase	ND	93	Warning	F	Imatinib					√
CML19	diagnosis	Leukapheresis PB	CD34-enriched	chronic phase	ND	89	Warning	M	Imatinib					√			√
CML20	diagnosis	Leukapheresis PB	CD34-enriched	chronic phase	ND	100	Optimal	F	Dasatinib								√
CML21	diagnosis	Leukapheresis PB	CD34-enriched	chronic phase	ND	>90	Optimal	F	Imatinib								√
CML22	diagnosis	Leukapheresis PB	CD34-enriched	chronic phase	ND	>90	Failure	F	Imatinib → Nilotinib → Dasatinib								√
CML23	diagnosis	Leukapheresis PB	CD34-enriched	chronic phase	ND	>90	Optimal	M	Imatinib								√
CML24	diagnosis	Leukapheresis PB	CD34-enriched	chronic phase	95	>90	Optimal	F	Imatinib									√
CML25	diagnosis	Leukapheresis PB	CD34-enriched	chronic phase	100	100	Optimal	F	Imatinib									√
CML26	diagnosis	Leukapheresis PB	CD34-enriched	chronic phase	ND	100	Warning	F	Imatinib → Dasatinib									√
CML27	diagnosis	Leukapheresis PB	CD34-enriched	chronic phase	100	>90	ND	ND	ND									√
CML28	diagnosis	Leukapheresis PB	CD34-enriched	chronic phase	ND	>90	Warning	M	Imatinib							√
CML29	diagnosis	Leukapheresis PB	CD34-enriched	chronic phase	>91	100	Warning	M	Dasatinib							√			√
CML30	diagnosis	Leukapheresis PB	CD34-enriched	chronic phase	ND	100	Failure	F	Imatinib → Nilotinib → Bosutinib → Imatinib											√
CML31	diagnosis	Leukapheresis PB	CD34-enriched	chronic phase	98	100	Failure	M	Nilotinib → Dasatinib											√
CML32	diagnosis	Leukapheresis PB	CD34-enriched	chronic phase	ND	>90	ND	M	ND											√
CON01		Cadaveric BM	CD34-enriched	N/A	N/A	N/A	N/A	N/A	N/A	√	√		√
CON02		Mobilised PBSCs	CD34-enriched	N/A	N/A	N/A	N/A	N/A	N/A	√	√		√
CON03		Mobilised PBSCs	CD34-enriched	N/A	N/A	N/A	N/A	N/A	N/A	√	√	√	√
CON04		Mobilised PBSCs	CD34-enriched	N/A	N/A	N/A	N/A	N/A	N/A			√
CON05		Mobilised PBSCs	CD34-enriched	N/A	N/A	N/A	N/A	N/A	N/A			√
CON06		Mobilised PBSCs	CD34-enriched	N/A	N/A	N/A	N/A	N/A	N/A					√
CON07		Mobilised PBSCs	CD34-enriched	N/A	N/A	N/A	N/A	N/A	N/A					√
CON08		Mobilised PBSCs	Sorted MNCs	N/A	N/A	N/A	N/A	N/A	N/A					√
CON09		Mobilised PBSCs	CD34-enriched	N/A	N/A	N/A	N/A	N/A	N/A							√
CON10		Mobilised PBSCs	CD34-enriched	N/A	N/A	N/A	N/A	N/A	N/A						√	√			√
CON10		Mobilised PBSCs	CD34-enriched	N/A	N/A	N/A	N/A	N/A	N/A										√
CON11		Mobilised PBSCs	CD34-enriched	N/A	N/A	N/A	N/A	N/A	N/A						√	√			√
CON12		Mobilised PBSCs	CD34-enriched	N/A	N/A	N/A	N/A	N/A	N/A						√
BM = bone marrow
MNCs = mononucleated cells
PBSCs = peripheral blood stem cells
PB = peripheral blood
ND = no data available
N/A = not applicable
